# Supplementary material
Source: PubMed Central journal article supplement (PMC8484060)

**Fig.1C 1 dpi**

LC3

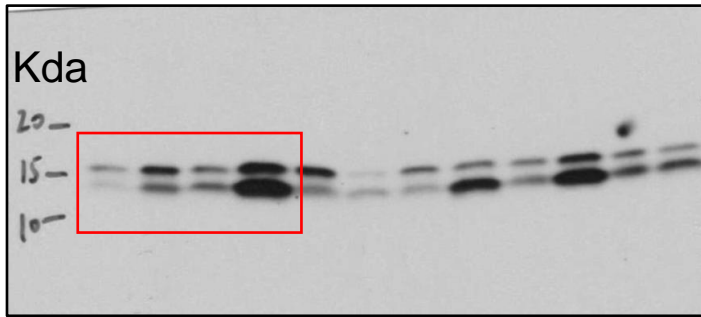

GAPDH

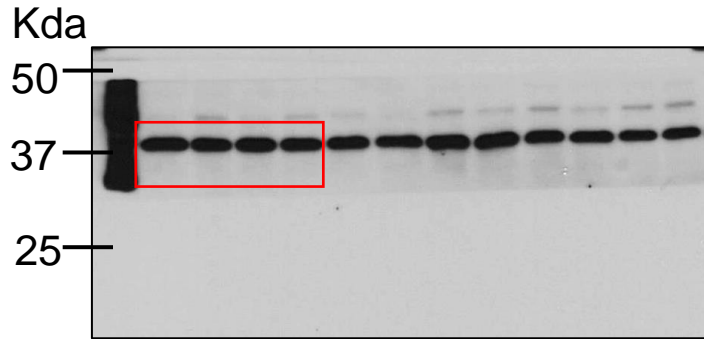

**Fig.1C 56 dpi**

LC3

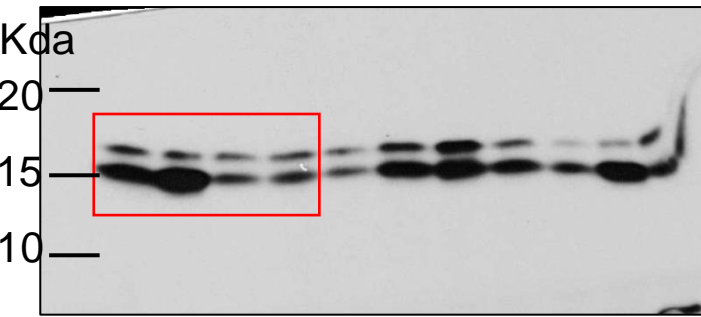

GAPDH

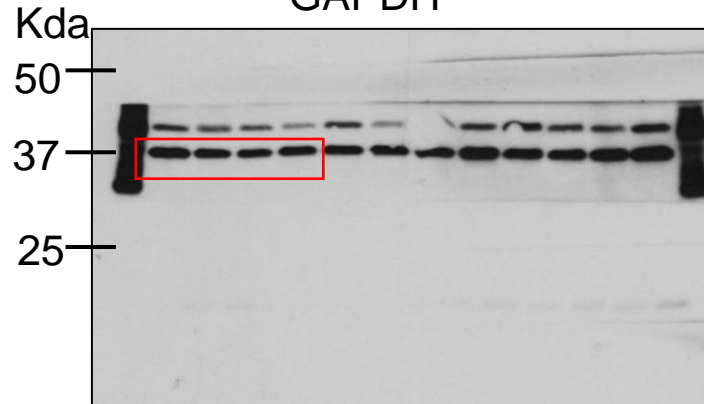

**Fig.1H**

LC3

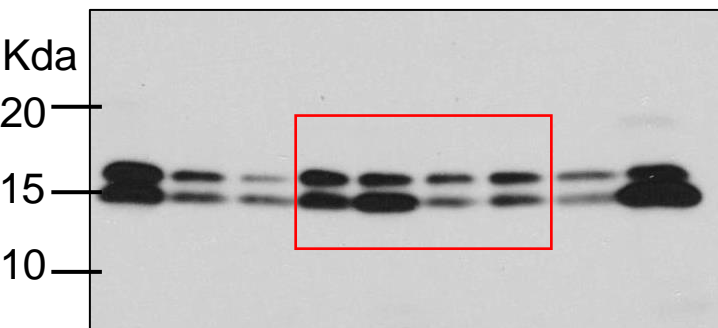

GAPDH

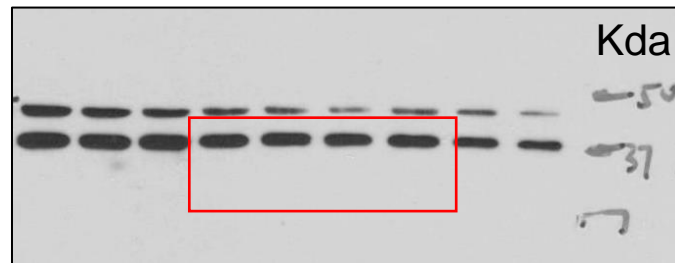

**Fig.2E**

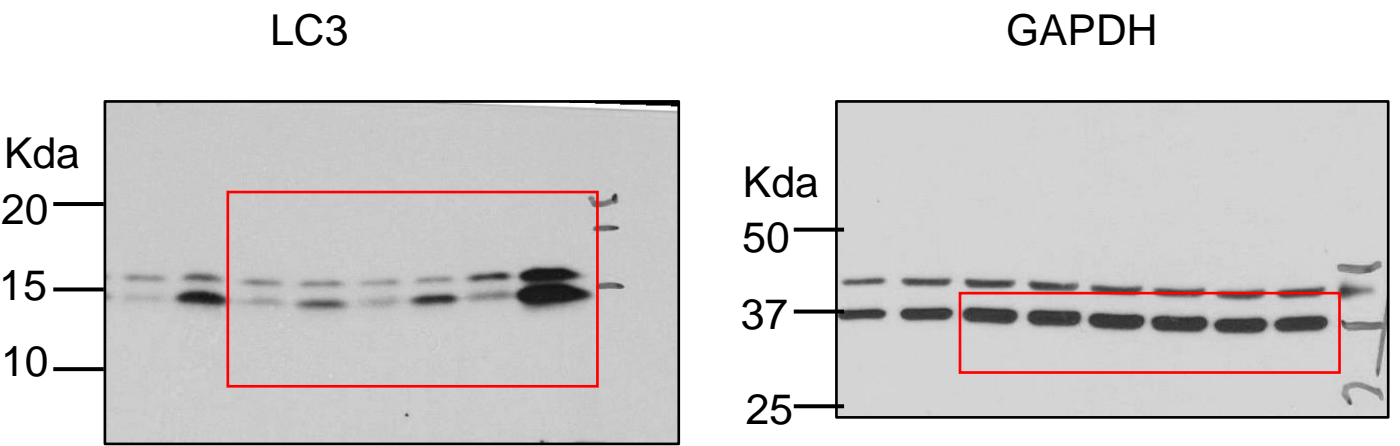

**Fig.3E**

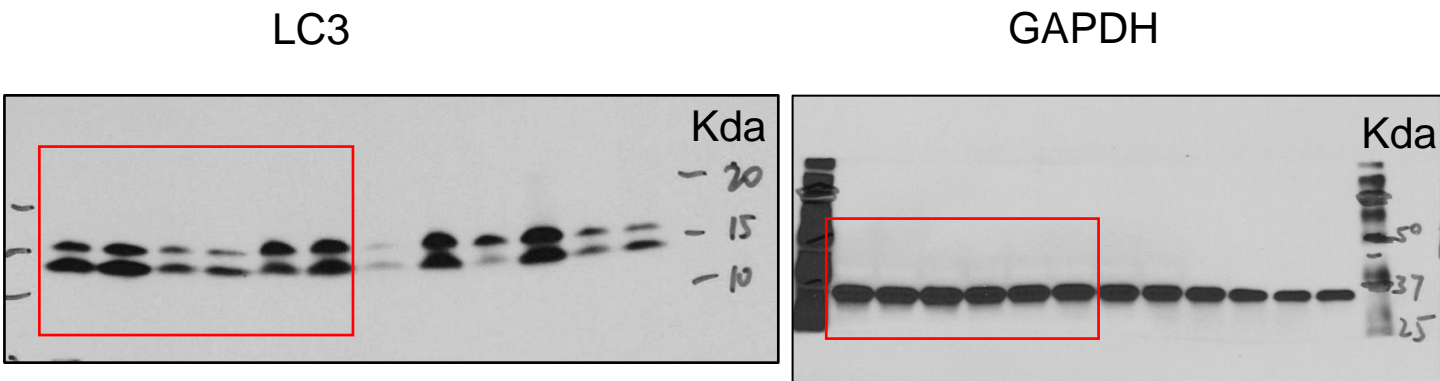

**Fig.4B**

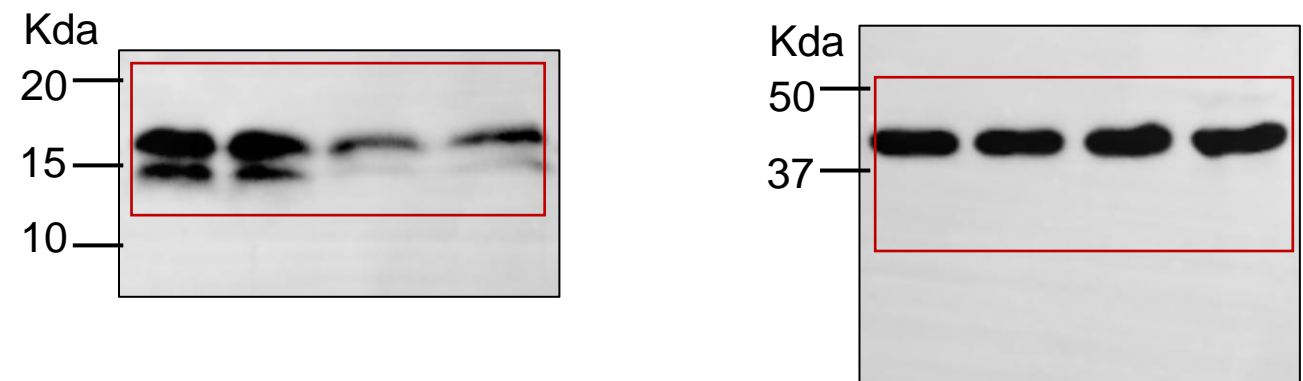

**Fig.7A**

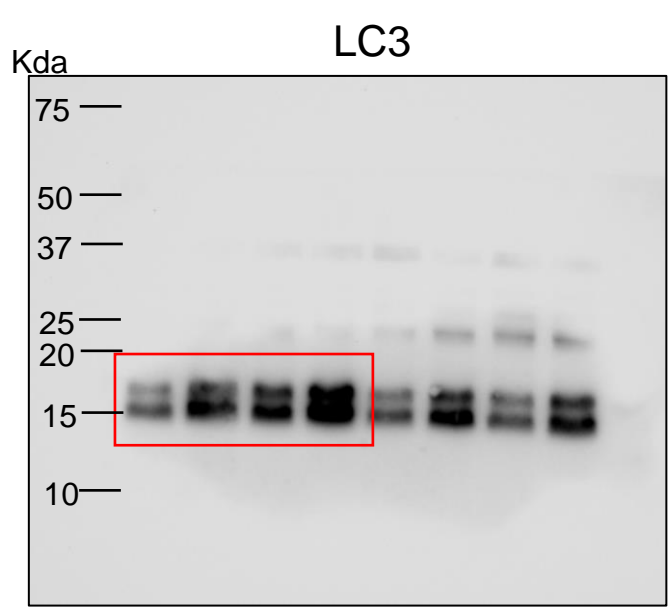

Full unedited blots for Figure 7

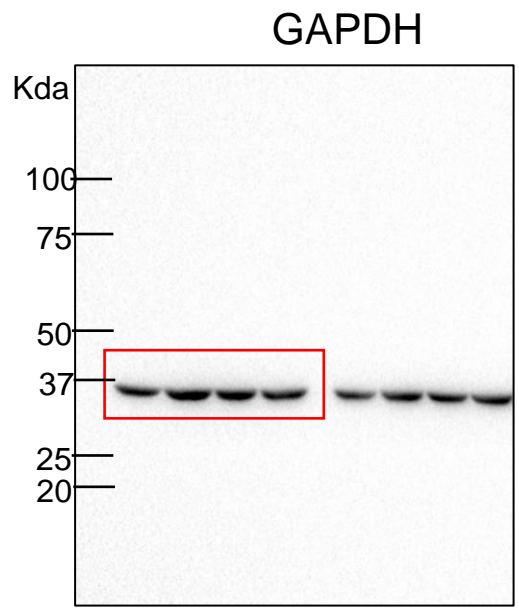

**Fig.7B**

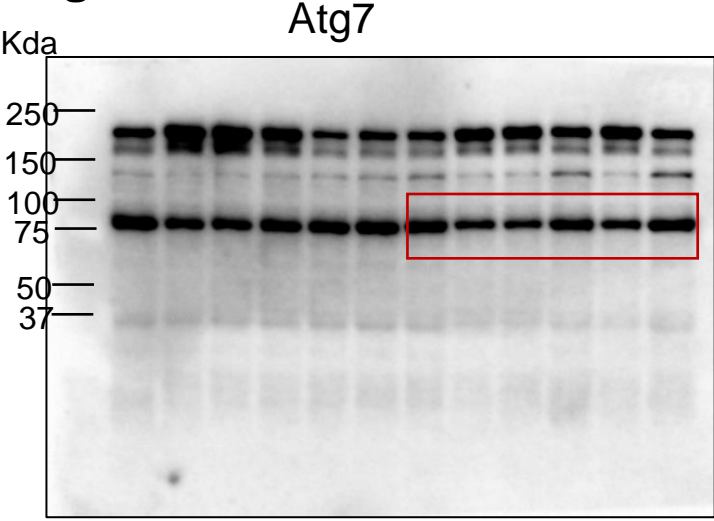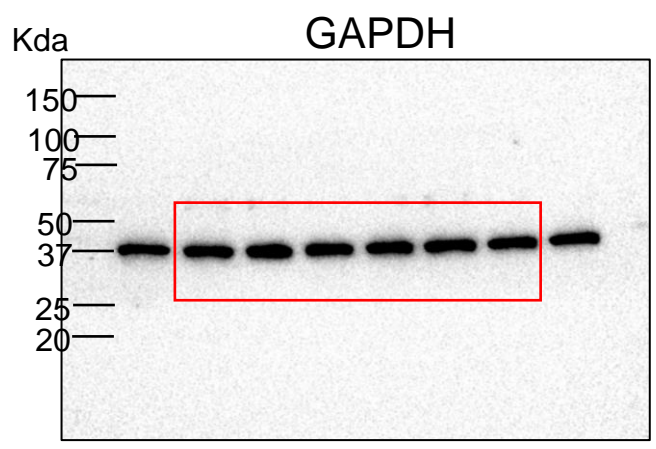

**Fig.7C**

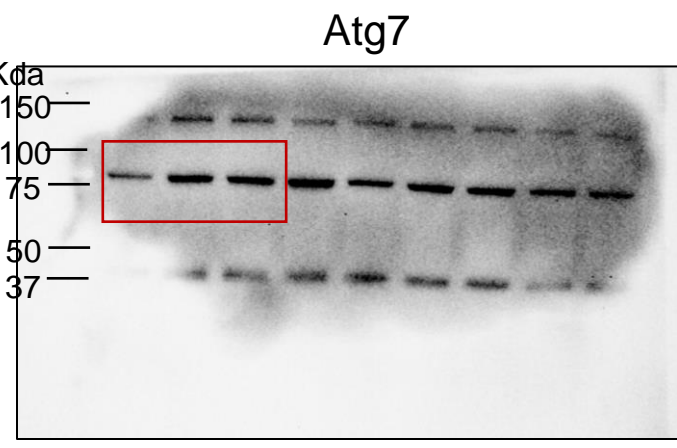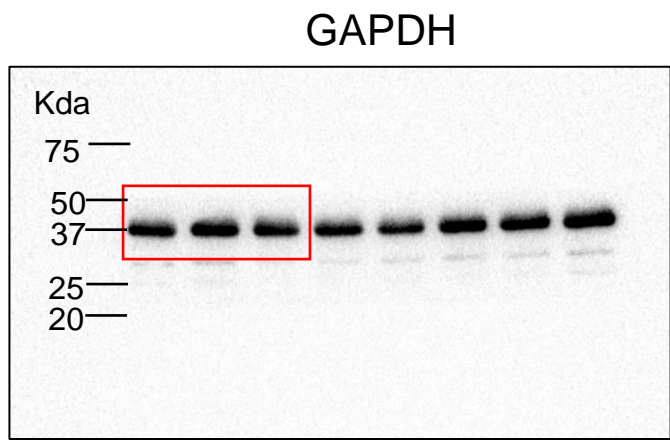

**Fig.8A**

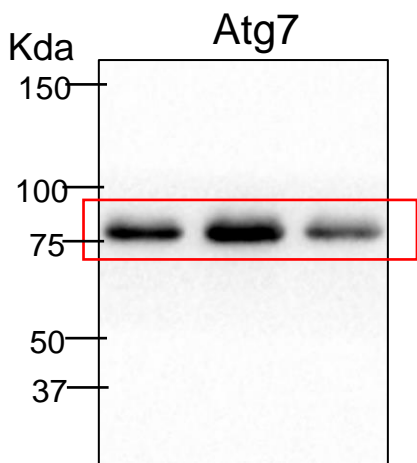

Full unedited blots for Figure 8

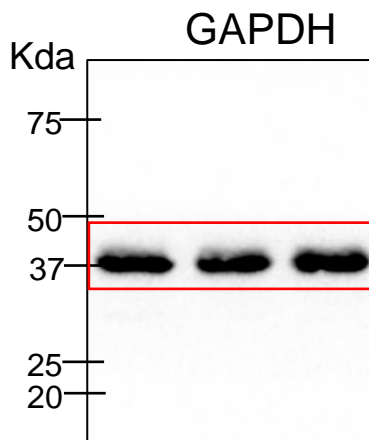

**Fig.8B**

Top 2b

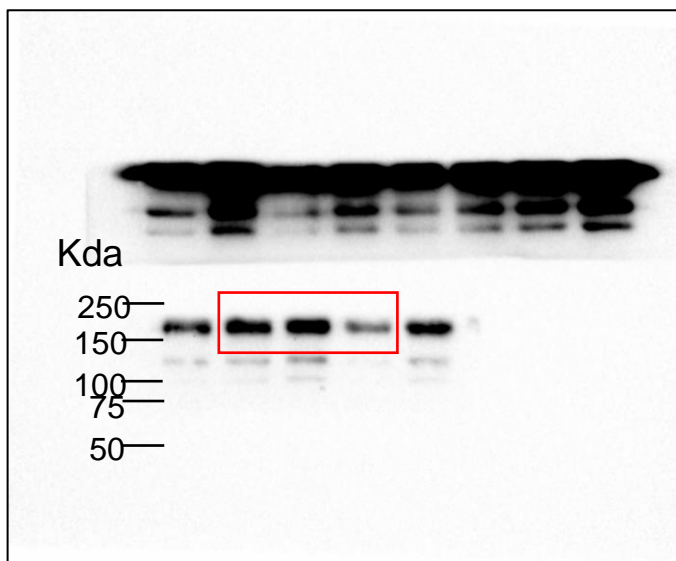

GAPDH

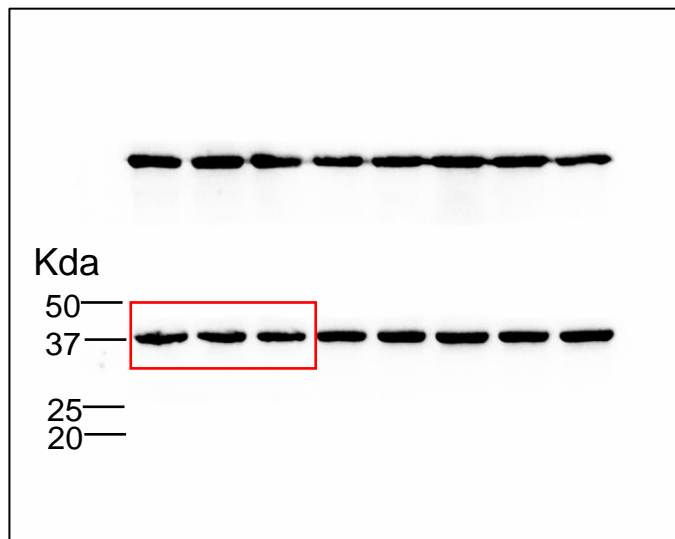

**Fig.8C**

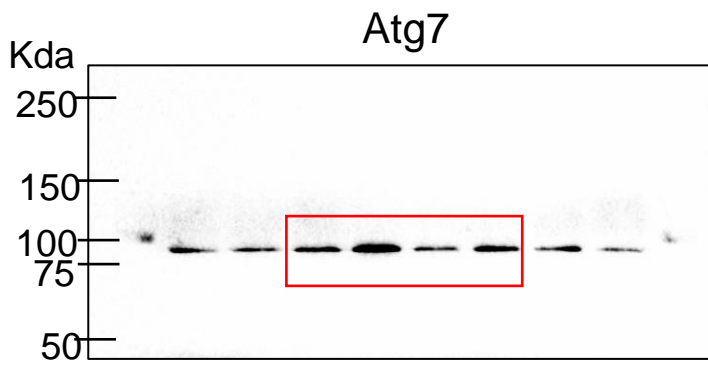

**Fig.8D**

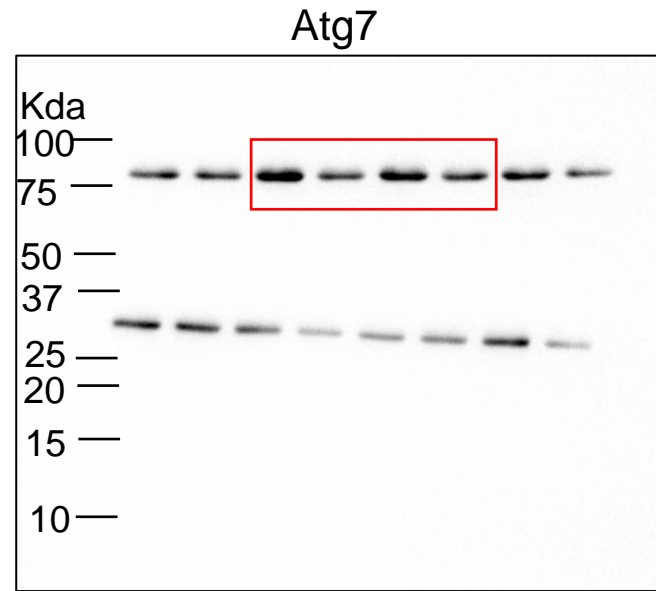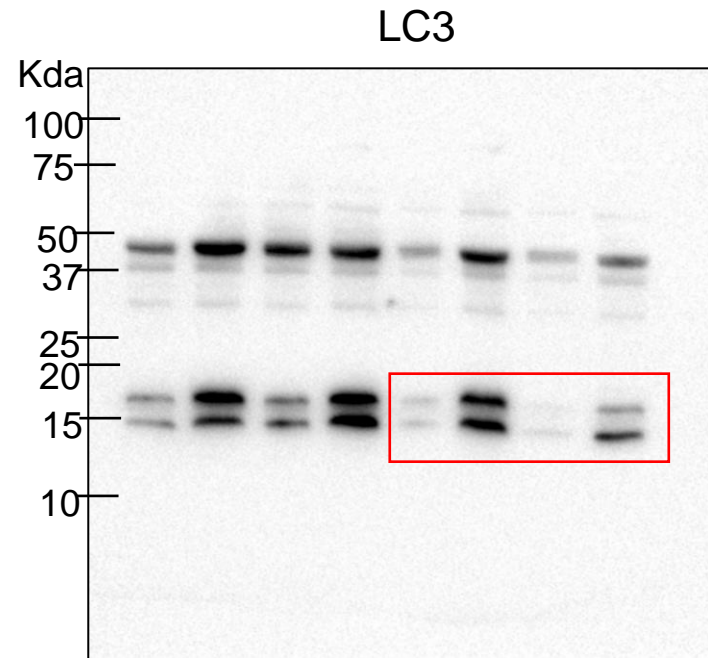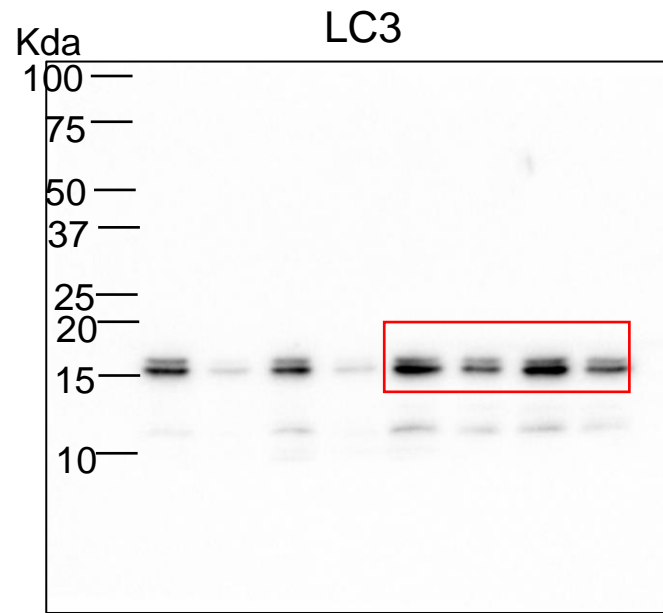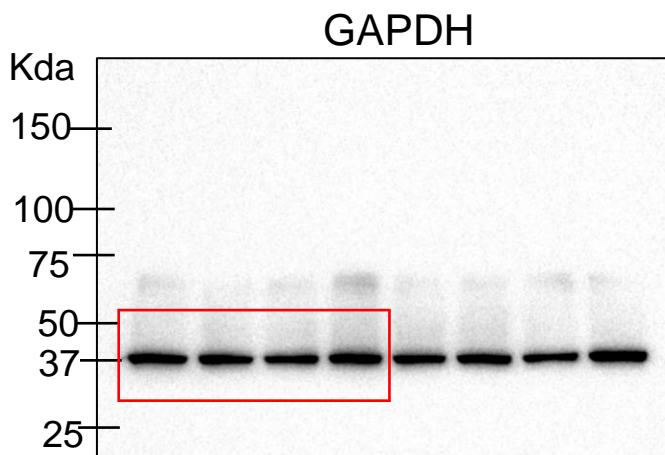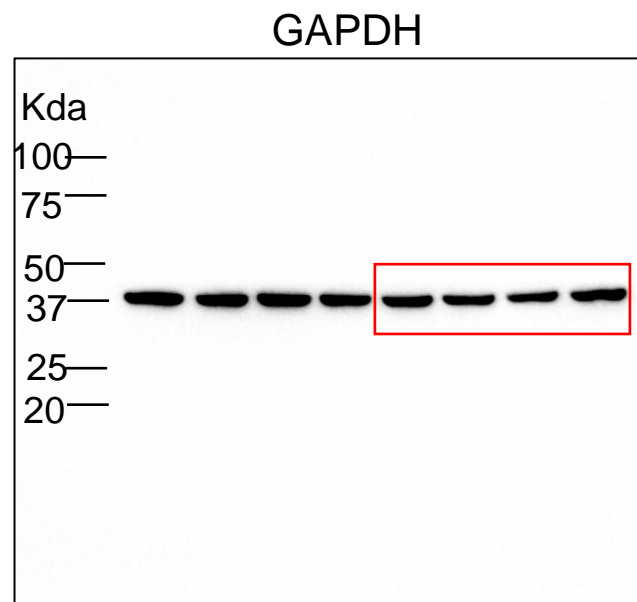

**Online Fig.I E 7 dpi**

LC3

GAPDH

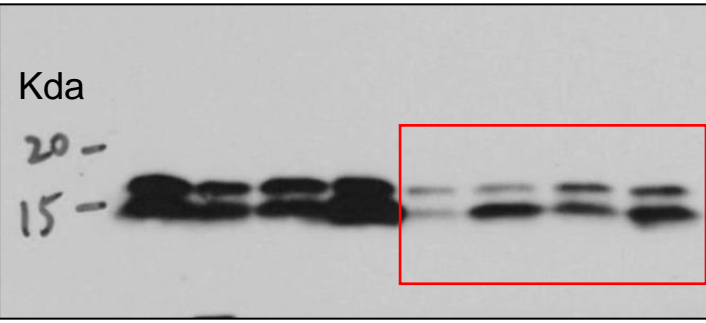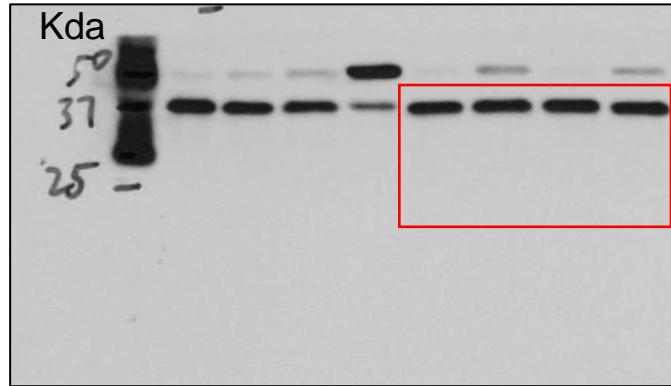

**Online Fig.I E 28 dpi**

LC3

GAPDH

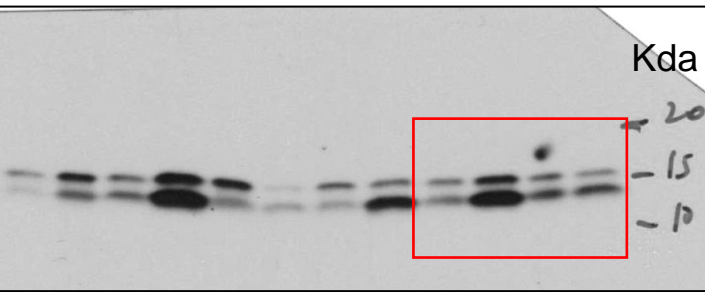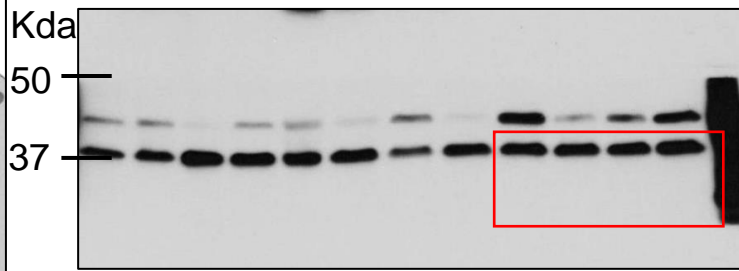

**Online Fig.II A**

LC3

GAPDH

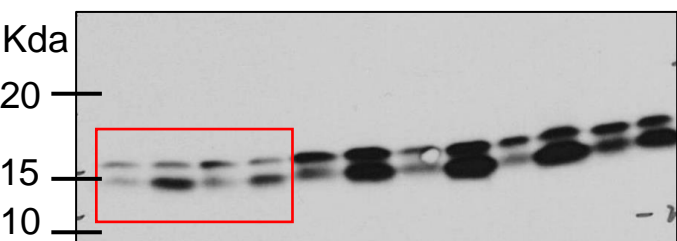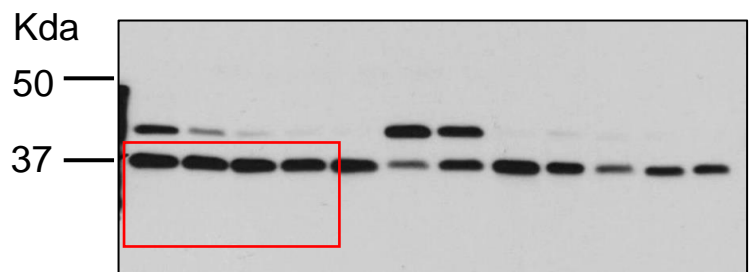

Supplement: NIHMS1733487-supplement-319104_Uncut_Gel_Blots.pdf [file NIHMS1733487-supplement-319104_Uncut_Gel_Blots.pdf]
