# Supplementary material
Source: PubMed Central journal article supplement (PMC8484060)
Supplement: NIHMS1733487-supplement-319104_Major_Resources_Table.pdf [file NIHMS1733487-supplement-319104_Major_Resources_Table.pdf]

## Major Resources Table

In order to allow validation and replication of experiments, all essential research materials listed in the Methods should be included in the Major Resources Table below. Authors are encouraged to use public repositories for protocols, data, code, and other materials and provide persistent identifiers and/or links to repositories when available. Authors may add or delete rows as needed.

### Animals (in vivo studies)

| Species   | Vendor or Source                               | Background Strain | Sex | Persistent ID / URL                                                               |
|-----------|------------------------------------------------|-------------------|-----|-----------------------------------------------------------------------------------|
| zebrafish | Zebrafish International Resource Center (ZIRC) | WIK               | F/M | <a href="http://zfin.org/ZDB-GENO-010531-2">http://zfin.org/ZDB-GENO-010531-2</a> |
| mice      | Beijing SPF Biotechnology Co., Ltd., China     | WIK               | M   | C57BL/6                                                                           |
|           |                                                |                   |     |                                                                                   |

### Genetically Modified Animals

|                 | Species   | Vendor or Source                | Background Strain                                         | Other Information | Persistent ID / URL                                                                   |
|-----------------|-----------|---------------------------------|-----------------------------------------------------------|-------------------|---------------------------------------------------------------------------------------|
| Parent - Male   | zebrafish | in house                        | Tg( $\beta$ actin2: loxP-mCherry-stop-loxP-atg7-cerulean) |                   |                                                                                       |
| Parent - Female | zebrafish | ZIRC                            | Tg(cmlc2:CreER)                                           |                   | <a href="http://zebrafish.org/home/guide.php">http://zebrafish.org/home/guide.php</a> |
|                 | zebrafish | ZIRC                            | atg7 sa10973                                              |                   | <a href="http://zebrafish.org/home/guide.php">http://zebrafish.org/home/guide.php</a> |
|                 | zebrafish | A gift from Dr. Klionsky DJ Lab | Tg(LC3-GFP)                                               |                   |                                                                                       |

### Antibodies

| Target antigen | Vendor or Source          | Catalog # | Working concentration | Lot # (preferred but not required) | Persistent ID / URL                                                                                                                                                                                                         |
|----------------|---------------------------|-----------|-----------------------|------------------------------------|-----------------------------------------------------------------------------------------------------------------------------------------------------------------------------------------------------------------------------|
| LC3            | Cell Signaling Technology | 12741S    | 1:3000                |                                    | <a href="https://www.cellsignal.com/products/primary-antibodies/lc3a-b-d3u4c-xp-rabbit-mab/12741">https://www.cellsignal.com/products/primary-antibodies/lc3a-b-d3u4c-xp-rabbit-mab/12741</a>                               |
| Atg7           | Cell Signaling Technology | 2631      | 1:1000                |                                    | <a href="https://www.cellsignal.com/products/primary-antibodies/atg7-antibody/2631">https://www.cellsignal.com/products/primary-antibodies/atg7-antibody/2631</a>                                                           |
| Top2b          | Abcam                     | ab109524  | 1:10000               |                                    | <a href="https://www.abcam.cn/topoisomerase-ii-alpha--topoisomerase-ii-betatop2b-antibody-epr5377-ab109524.html">https://www.abcam.cn/topoisomerase-ii-alpha--topoisomerase-ii-betatop2b-antibody-epr5377-ab109524.html</a> |
| GAPDH          | Santa Cruz                | sc-25778  | 1:2000                |                                    | <a href="https://www.scbt.com/p/gapdh-antibody-fl-335">https://www.scbt.com/p/gapdh-antibody-fl-335</a>                                                                                                                     |
| $\beta$ -actin | Sigma                     | A3854     | 1:2000                |                                    | <a href="https://www.sigmaaldrich.com/catalog/product/sigma/a3854?lang=en&amp;region=US">https://www.sigmaaldrich.com/catalog/product/sigma/a3854?lang=en&amp;region=US</a>                                                 |
| $\gamma$ -H2AX | Abcam                     | ab81299   | 1:250                 |                                    | <a href="https://www.abcam.cn/gamma-h2ax-phospho-s139-antibody-ep8542y-ab81299.html">https://www.abcam.cn/gamma-h2ax-phospho-s139-antibody-ep8542y-ab81299.html</a>                                                         |

### DNA/cDNA Clones

| Clone Name | Sequence | Source / Repository | Persistent ID / URL |
|------------|----------|---------------------|---------------------|
|            |          |                     |                     |

DOI [to be added]

|  |  |  |  |
|--|--|--|--|
|  |  |  |  |
|--|--|--|--|

**Cultured Cells**

| Name  | Vendor or Source | Sex (F, M, or unknown) | Persistent ID / URL                                                                                           |
|-------|------------------|------------------------|---------------------------------------------------------------------------------------------------------------|
| H9C2  | ATCC             | unknown                | <a href="https://www.atcc.org/products/all/CRL-1446.aspx">https://www.atcc.org/products/all/CRL-1446.aspx</a> |
| MCF-7 | BMCR             | unknown                | <a href="http://www.cellresource.cn/fdetail.aspx?id=5916">http://www.cellresource.cn/fdetail.aspx?id=5916</a> |
| U87   | BMCR             | unknown                | <a href="http://m.cellresource.cn/fdetail.aspx?id=4041">http://m.cellresource.cn/fdetail.aspx?id=4041</a>     |
| HepG2 | BMCR             | unknown                | <a href="http://m.cellresource.cn/fdetail.aspx?id=3903">http://m.cellresource.cn/fdetail.aspx?id=3903</a>     |

**Data & Code Availability**

| Description | Source / Repository | Persistent ID / URL |
|-------------|---------------------|---------------------|
|             |                     |                     |
|             |                     |                     |
|             |                     |                     |

**Other**

| Description | Source / Repository | Persistent ID / URL |
|-------------|---------------------|---------------------|
|             |                     |                     |
|             |                     |                     |
|             |                     |                     |
