# Supplementary material
Source: PubMed Central journal article supplement (PMC8484060)
Supplement: NIHMS1733487-supplement-319104_Online.pdf [file NIHMS1733487-supplement-319104_Online.pdf]

---

## **SUPPLEMENTAL MATERIAL**

### **Expanded Materials & Methods**

#### **Study design**

In this study, we provide both genetic and chemical-genetic evidence to demonstrate that autophagy activation can reverse anthracycline-induced cardiac function decline. Using both a transgenic fish line that overexpresses *atg7* and an *atg7*-knockout mutant line, we discovered therapeutic effects of *atg7* overexpression in the later phase of AIC, which differs from its deleterious effects in the early phase. To translate this autophagy-based therapeutic strategy, we assessed autophagy-modulating drugs in a zebrafish eAIC model, confirmed the top-ranking drugs in a zebrafish aAIC model, and then validated the therapeutic efficacy of the top drugs in a mouse AIC model. Power analysis was performed by using PASS 11 software to determine approximate sample sizes for the animal heart function analysis.<sup>39, 40</sup> The sample size calculation based on assumption of an intended power of 80%(90%), an alpha error of 5%, at a reference normal ejection fraction of 50%-60% as well as applying model group of 35%-50%, and an equal sample ratio results. For all animal experiments, the animal groups were randomized, and the researchers were blind to the genotypes and treatments of animals. We did not separate male from female in the animal studies because we did not notice any difference during our experimentation. No animals were excluded from the analysis.

#### **Animal husbandry**

Wild-type adult zebrafish (*Danio rerio*) were maintained at 28.5°C in a light-dark cycle (14-h of light and 10 h of darkness). Zebrafish embryos were maintained in a 1-mm petri dish with E3 water at 28.5°C until 7 dpf, and then, they were maintained in a recycling water system. Animal density was maintained after 28 dpf at 15-20 fish per 3 liters. The *atg7*-mutant (*atg7<sup>sa10973</sup>*) and *cmlc2:creER* zebrafish lines were purchased from the Zebrafish International Resource Center (ZIRC).

C57/BL6 mice were maintained in a 12-h light/12-h dark cycle from 6 AM to 6 PM. All animal experiments were approved by the Mayo Clinic College of Medicine Institutional Animal Care and Use Committee (A00002577-17) and Beijing University of Chinese Medicine Animal Care Committee (BUCM-4-2018101504-4068). Please see the Major Resources Table in the Supplemental Materials.

#### **Zebrafish eAIC model, aAIC model and mouse AIC model**

Zebrafish eAIC model: The protocol for establishing the eAIC model was based on a previous study.<sup>20</sup> Zebrafish embryos 1 dpf were distributed in a 96-well plate after removal of the chorions, with each well containing 3 fish embryos in 200 µl of E3 water with either DMSO or 100 µmol/L doxorubicin hydrochloride (DOX; Sigma). The plates were covered with foil to avoid light exposure and incubated at 28.5°C. The medium was exchanged for fresh medium every day. Three days postfertilization, the zebrafish were phenotyped based on survival rate, heart rate, and fraction shortening.

44 Zebrafish aAIC model: The protocol for establishing the zebrafish aAIC model  
45 was modified based on a previous study.<sup>16</sup> The dose of 20 mg/kg DOX was determined  
46 experimentally and is comparable to the accumulative dose used in rodent AIC models  
47 (15-25 mg/kg).<sup>16</sup> DOX was injected intraperitoneally (IP) into anesthetized adult  
48 zebrafish using a syringe with a 34 G needle. The fish were positioned in the cavity of  
49 a sponge with their abdomen up. The needle penetrated the ventral midline between  
50 the pectoral fins, and with the needle pointing posteriorly, towards the tail, entered the  
51 abdomen and then continued to move under the silver skin. Because the skin is  
52 partially transparent, it is possible to closely monitor the movement of the needle,  
53 avoiding any physical damage to intestines and/or other internal organs.

54 Mouse AIC model: The protocol for establishing the mouse AIC model is based  
55 on a previous study.<sup>12</sup> Either tail vein injection (IV) or intraperitoneal injection (IP) was  
56 conducted in adult mice with DOX. Either a single injection of 20 mg/kg DOX or  
57 multiple injections of 5 mg/kg DOX weekly for 4 consecutive weeks was carried out.  
58 As a stock solution, DOX was dissolved in 0.9% saline as a 2 mg/ml solution. Based  
59 on the body weight of each mouse, the injection volume was calculated to reach the  
60 desired dose.

#### 61 62 **Quantification of the heart function in the eAIC model zebrafish**

63 Embryos 3 dpf were anesthetized in tricaine (0.02%) (Argent Chemical  
64 Laboratories) for 2 min, placed on their lateral side, and held in place with 3% methyl  
65 cellulose (Sigma-Aldrich). Beating hearts were documented using a Zeiss Axioplan II  
66 microscope with a 10.0X lens. Ld and Ls, the length of the short axis of the ventricle  
67 at the end-diastolic stage and end-systolic stage, respectively, were measured using  
68 ImageJ software. Fraction shortening (FS) was calculated using the formula:  
69  $[FS=(Ld-Ls)/Ld]$ .<sup>41</sup> Tail blood flow was recorded by a high-speed camera and  
70 calculated by a customized analysis algorithm.<sup>15, 42</sup> We used a microscope to record  
71 a video of the end of the zebrafish tail vein for 30 seconds, and then, the video was  
72 played at 8%-10% original speed utilizing tracker software. We measured the red  
73 blood cell flow rate within a fixed time of 30 seconds. Each video clip was counted  
74 three times to obtain caudal vein velocity per unit time.

#### 75 76 **Quantification of the heart function in the aAIC model zebrafish**

77 High-frequency echocardiography was carried out using a Vevo 3100 high-  
78 frequency imaging system (Fujifilm Visual Sonics Inc., Toronto, Canada) equipped  
79 with a 50-MHz linear array transducer (MX700). Acoustic gel (Aquasonic 100, Parker  
80 Laboratories Inc.) was applied over the surface of the transducer to provide adequate  
81 coupling with the tissue interface. Zebrafish were anesthetized with tricaine (0.16  
82 mg/ml), placed ventral side up, and held in place on a soft-sponge stage. The MX700  
83 transducer was positioned above the zebrafish to provide a sagittal imaging plane of  
84 the heart. B-mode images were acquired with an imaging field of view of 9.00 mm in  
85 the axial direction and 5.73 mm in the lateral direction, a frame rate of 123 Hz, medium  
86 persistence, and a transmit focus at the center of the heart. Images were quantified  
87 using the Vevo LAB workstation. Ejection fraction were measured from B-mode

88 images. Cardiac contractility was quantified using ejection fraction (EF)  
89  $[EF=(EDV-ESV)/EDV]$  or fractional shortening (FS)  $[FS=(Ld-Ls)/Ld]$ , where EDV and  
90 ESV are the ventricular volumes at the end-diastolic stage and end-systolic stage,  
91 respectively.<sup>43</sup> Three to five independent cardiac cycles per fish were measured to  
92 determine average values.

### 93 94 **Quantification of the heart function in the AIC model mice**

95 Heart function and ventricular size were measured using a Vevo 2100 imaging  
96 system equipped with an MS400C scan head. Two-dimensionally directed M mode  
97 (2D M-mode) images of the left ventricle were acquired from the short axis view. Left  
98 ventricular internal diameters at end-diastole (LVEDD) and end-systole (LVESD) were  
99 measured. Fractional shortening (FS) was calculated using the formula  $(LVEDD -$   
100  $LVESD)/LVEDD$  (%). Ejection fraction (EF) was calculated using the formula  $(LVEDV$   
101  $- LVESV)/LVEDV$  (%).

### 102 103 **Western blotting**

104 Freshly dissected tissues were collected and mechanically homogenized in lysis  
105 buffer (Sigma-Aldrich) used for radioimmunoprecipitation assay containing proteinase  
106 inhibitor, phenylmethylsulfonyl fluoride, and stainless steel beads. Standard Western  
107 blotting protocol were followed. Samples were separated by sodium dodecyl sulfate  
108 polyacrylamide gel electrophoresis (SDS-PAGE) and then transferred onto a PVDF  
109 membrane (Millipore, CA, USA). The following primary antibodies were used: anti-LC3  
110 antibody (1:3000; Cell Signaling Technology), anti-Atg7 antibody (1:1000; Cell  
111 Signaling Technology), anti-Top2b antibody(1:10000; Abcam), anti-actin (1:2000;  
112 Sigma-Aldrich), and anti-GAPDH (1:2000; Santa Cruz Biotechnology).

### 113 114 **Generation of the Tg( $\beta$ actin2: loxP-mCherry-stop-loxP-atg7-cerulean) 115 transgenic line**

116 The transgenic line was generated using the Tol2/Gateway system. The loxP-  
117 mCherry-stop-loxP fragment was inserted into the Kpn I/Eco RI sites of a pENTRI1a  
118 vector obtained from the Tol2Kit.<sup>44</sup> Full-length atg7 cDNA (ENSDARG00000102893.3)  
119 from a cDNA pool was amplified using forward primer 5'-  
120 GATGGCGGAATCCAGTCTGAAGC-3' and reverse primer 5' -  
121 GATGCTCTCGTCTCACTCATGTCC-3'. A clone with the correct sequence of full-  
122 length atg7 was confirmed by Sanger sequencing, and the gene was then cloned into  
123 a pENTRI1-loxP-mCherry-stop-loxP vector. To generate the final construct, p5E-  
124 bactin2, pENTRI-loxP-mCherry-stop-loxP-atg7, p3E-cerulean-polyA and  
125 pDestTol2pA were combined using Gateway LR Clonase II Plus Enzyme (Thermo  
126 Fisher). Founder zebrafish fish (F0) were identified on the basis of mCherry  
127 fluorescence. Founder fish were also identified by genotyping using the forward primer  
128 5'- CTTTTTACTGAGCCCTACGAC-3' and the reverse primer 5'-  
129 CTTTCGTCTAAGCGGTACTCG-3'. F2- and F3-generation transgenic zebrafish were  
130 used for experiments.

131

---

### 132 **Conditional expressional system**

133 4HT (4-hydroxytamoxifen, Sigma-Aldrich) powder was dissolved in 100% ethanol  
134 to generate a 12.9 mM stock solution, which was stored at 20°C. The stock solution  
135 was diluted in aquarium water for different working concentrations. To activate a  
136 tissue-specific promoter,<sup>45, 46</sup> Tg( $\square$ act2:atg7);Tg(cmlc2:CreER) double-transgenic  
137 adult zebrafish were incubated in 400 ml of system water containing 1  $\mu$ mol/L 4HT in  
138 a 1-liter mini tank for 24 h. Subsequently, the zebrafish were rinsed in fresh water and  
139 returned to the system.

### 140 **Real-time quantitative PCR**

141 Freshly dissected tissues were pooled for RNA extraction. RNA was extracted  
142 using TRIzol (Bio-Rad) following the manufacturer's instructions. cDNA was  
143 synthesized from 100 - 500 ng of RNA by using a Superscript III First-Strand Synthesis  
144 System (Invitrogen). Real-time reverse transcription PCR assays were performed in  
145 96-well optical plates (Thermo Fisher Scientific) using an Applied Biosystems Vii 7  
146 System (Thermo Fisher Scientific). Amplification was comprised of a 10 min initial  
147 denaturation/activation step at 95°C, followed by 40 cycles of 95°C for 10 s, 60°C for  
148 30 s, and a fluorescence measurement. Melting curve analysis was performed by  
149 monitoring fluorescence throughout incremental increases of temperature from 60°C  
150 to 95°C. Levels of gene expression were normalized to the expression of  
151 glyceraldehyde 3-phosphate dehydrogenase (gapdh) using  $-\Delta\Delta C_t$  (cycle threshold)  
152 values. The primers were 5'-ACTCAACGAGTACCGCTTAG -3' (sense) and 5'-  
153 CTCATTGGCTGCTTTGTCC 3' (antisense) for zebrafish atg7, 5'-  
154 TCAGATGGCAGAGTTTGGAG-3' (sense) and 5'- CGTGTATCTGGAGTGAAACTG-  
155 3' (antisense) for zebrafish nppa, 5'-GCAGGAATACACAATCCGC-3' (sense) and 5'-  
156 CGTGTATCTGGAGTGAAACTG-3' (antisense) for zebrafish nppb, 5'-  
157 AGAGGAGAACTGGCACAGG -3' (sense) and 5'- CAAACTACCCACCAGCCAGT -  
158 3' (antisense) for zebrafish Top2b, 5'-CCACCCATGGAAAGTACAAG-3' (sense) and  
159 5'-CTCTCTTTGCACCACCCTTA-3' (antisense) for zebrafish gapdh. In mouse studies,  
160 the primers were 5'- GACTGTGCTGGTCTCCTTGC -3' (sense) and 5'-  
161 GTCCATACATCCGCTGAGGTTTAC-3' (antisense) for mouse Atg7 and 5'-  
162 TTCAACGGCACAGTCAAG-3' (sense) and 5'-TACTCAGCACCAGCATCA-3'  
163 (antisense) for mouse Gapdh.

### 164 **Compounds for drug screening**

165 All FAAs used in this study (the name, company and catalog number are listed in  
166 Table S1) were dissolved in dimethyl sulfoxide (DMSO, Sigma Aldrich). DMSO (0.1%)  
167 was used as a negative control. We also used the following autophagy activators: Tat-  
168 Beclin 1 peptide (Ana Spec),<sup>47</sup> rapamycin (Sigma-Aldrich) and the following autophagy  
169 inhibitors: bafilomycin A1 (Sigma-Aldrich) and 3-MA (Sigma-Aldrich).<sup>48</sup> Zebrafish  
170 embryos were incubated in E3 water containing compounds at the desired  
171 concentrations.  
172  
173  
174

---

## 175 **Deducing the concentration of drugs with the eAIC model to use in the aAIC** 176 **model**

177 Based on the eAIC model, we obtained the effective dose for each compound  
178 experimentally. We used the formula listed in online Fig VI B to deduce the  
179 corresponding concentration in aAIC.<sup>49</sup> We assumed that all the drugs added to 96-  
180 well plates were absorbed by the fish embryos (we arranged 3 embryos in each well  
181 with 0.2 ml of medium). The average weight of an adult zebrafish is approximately 0.3  
182 g, and that of an embryo is 0.005 g. Thus, the weight ratio between adult fish and  
183 embryos is 60 (300/5).

## 184 185 **Drug administration to adult fish and mice via oral gavage**

186 To administer drugs, adult zebrafish were anesthetized with tricaine and then  
187 propped vertically in a damp sponge.<sup>50, 51</sup> The fish mouth was opened, and a soft  
188 catheter tube (Braintree Scientific) was inserted 1.0~1.5 cm deep to reach the fish  
189 stomach. In general, the insertion process was unobstructed; however, any  
190 obstructions encountered were circumvented by changing the insertion angle. The  
191 drug was released in the zebrafish when the syringe was depressed. The delivery  
192 volume was less than 1  $\mu$ l/100 mg body weight.

193 To administer drugs to mice, a standard gavage protocol was used.<sup>52</sup> The doses  
194 of Spi (20 mg·kg<sup>-1</sup>),<sup>53</sup> Pra (40 mg·kg<sup>-1</sup>)<sup>54</sup> and Rapa (2.81 mg·kg<sup>-1</sup>)<sup>55</sup> were determined  
195 based on previous studies. Mino (10.23 mg·kg<sup>-1</sup>) was determined based on a  
196 conversion from human to mouse according to the FDA guideline (Online Fig. VI C).  
197 Given that these drugs are poorly soluble in water, we applied a 0.5% aqueous solution  
198 of sodium carboxymethylcellulose (CMC) as a vehicle, as described in a previous  
199 study.<sup>56</sup>

## 200 201 **Histological analysis and immunofluorescence microscopy**

202 Left ventricle tissue from each group was fixed with 4% paraformaldehyde,  
203 embedded with paraffin, and sectioned into about a 5  $\mu$ m slice. Then slices were  
204 stained with hematoxylin-eosin (H&E). Specifically, following steps of deparaffination  
205 in xylene and ethanol (100%, 96%, 70%, 50%) solutions at room temperature, slides  
206 were washed in RNase-Free water and RNase-Free PBS. Slides were then incubated  
207 with Haematoxylin solution for 3 minutes followed by wash in RNase-Free water.  
208 Following bluing step for 3 minutes, slides were then washed in running tap water for  
209 5minutes and counterstained with Eosin for 3 seconds. Sections were then washed in  
210 tap water and dehydrated (95%, 100% EtOH, Xylene) and mounted with xylene-based  
211 mounting medium to be imaged. Additionally, we detected the DNA double strand  
212 breaks (DSB) in myocardial tissue. The sections were blocked, permeated and  
213 incubated with antibody against  $\gamma$ -H2AX (anti- $\gamma$ -H2AX, ab81299, Biolegend, US) for  
214 24 h at 4°C followed by incubation with horseradish peroxidase (HRP) conjugated  
215 secondary antibody for 30 min at room temperature. Finally, the slides were developed  
216 using diaminobenzidine (DAB). Nuclear staining by hematoxylin was performed as  
217 counterstaining. The tissue slides were also stained with TUNEL for detection of

218 myocardium apoptosis. Briefly, tissue slides deparaffinized were treated with 20 µg/ml  
219 proteinase K for 20 min at 37°C, and then were rinsing in PBS for 3 times. The  
220 specimens were then incubated with TUNEL detection solution containing terminal  
221 deoxynucleotidyl transferase (TdT) and fluorescent labeling solution for 1 h at 37 °C.  
222 Dihydroethidium (DHE) staining were used to measure the production of ROS in  
223 cardiac sections. DHE was obtained from Sigma-Aldrich LLC (Shanghai, China).  
224 Frozen sections of the cardiac tissue were incubated with 5 µM DHE in a light-  
225 protected humidified chamber for 30 min at 37°C. All images were acquired under an  
226 optical microscope (Leica Microsystems GmbH).

227

### 228 **Analysis of biomarkers in serum**

229 Serum supernatants were extracted from abdominal aortic blood. The blood was  
230 poured into a collection tube and allowed to stand for 2 h at room temperature. Then,  
231 the blood was centrifuged for 15 min at 3000 r/min. The upper layer of serum was  
232 transferred to a new 1.5-ml Eppendorf tube. Lactate dehydrogenase (LDH) and  
233 creatine kinase-MB (CK-MB) activity was quantified using an automatic biochemical  
234 analyzer (HITACHI 7080, Japan).

235

### 236 **Electron Microscopy**

237 1 mm<sup>3</sup> cardiac tissue was fixed with 2.5% (v/v) glutaraldehyde. After three washes  
238 with 0.1 mol/L sodium cacodylate buffer, tissue was post-fixed in 1% osmium tetroxide  
239 and 0.8% K<sub>3</sub> [Fe(CN<sub>6</sub>)]/0.1 mol/L sodium cacodylate buffer for 1 hour (RT). Then  
240 followed by three rinses with water, specimens were then dehydrated with increasing  
241 dosages of ethanol, infiltrated with Embed-812 resin, and polymerized at a 60°C oven  
242 overnight. Blocks were then sectioned with a diamond knife on a Leica Ultracut UC7  
243 ultramicrotome and collected onto copper grids, stained with 2% uranyl acetate in  
244 water and lead citrate. Finally, images were obtained using a Tecnai G2 spirit  
245 transmission electron microscope (FEI).

246

### 247 **H9C2 cell culture system**

248 GFP-mCherry-LC3 adenovirus transfection: According to the manufacturers'  
249 instructions (Hanbio Technology, Shanghai, China), H9C2 cell cultures were split one  
250 day before adenovirus transfection and reached 50-60% confluence after 24 h.  
251 Following the experimental protocol, H9C2 cells were incubated with adenovirus  
252 (multiplicity of infection=10) for approximately 8 h. Images were obtained using a laser  
253 confocal microscope (Leica Microsystems GmbH). To determine the colocalization  
254 efficiency of GFP with mCherry signals, ImageJ software was used.

255 Small interfering (si) RNA transfection: H9C2 cells were cultured in serum- and  
256 antibiotic-free siRNA transfection medium (Santa Cruz Biotechnology). Atg7 siRNA  
257 (5'-CTCGCCGAGCTCGCCCA-3') and Top2b siRNA (5'-  
258 GGUGCAAACUUUGUAAUADTDT-3') were purchased from Hanbio Technology  
259 (Shanghai, China). Cells transfected with nonspecific scramble siRNA (NC siRNA)  
260 were used as controls. Lipofectamine 2000 (Thermo Fisher Scientific) was applied to

---

261 perform siRNA transfection (100 nmol/L) according to the manufacturer's instructions.  
262 The cells were analyzed 48 h after transfection.

263

### 264 **Tumor cell lines**

265 MCF-7, U87 and HepG2 cells were obtained from China Infrastructure of Cell Line  
266 Resources (Chinese Academy of Medical Sciences, China). Cells were cultured in  
267 Dulbecco's modified Eagle's medium (DMEM; Gibco, 11965-084) with 10% fetal  
268 bovine serum (FBS; Gibco, 16000-044) and 1% 100 U/mL penicillin/streptomycin  
269 (Corning, NYC, USA) in an incubator (Thermo, NYC, USA). CCK-8 was used to  
270 evaluate the interference of drugs on the anticancer effect of DOX.

271

### 272 **Statistical analyses**

273 Graphs are presented as scatters or bar charts of means  $\pm$  standard deviation (SD).  
274 All statistical analyses were conducted using R, SPSS 22.0 and Prism 8 (GraphPad)  
275 software. Unpaired two-tailed Student's t-test was used to compare two groups; one-  
276 way analysis of variance (ANOVA) (or Kruskal-Wallis test) followed by Tukey's post  
277 hoc test and Bonferroni post hoc test, was used for comparing three or more groups.  
278 All the data obtained from in vivo experiments was test for normal distribution using  
279 the Kolmogorov-Smirnov test. Data following a normal distribution was analyzed using  
280 unpaired t-test. In the case of data not-normally distributed or n too small ( $n < 6$ ) to test  
281 for normality, statistical significance was analyzed using Mann-Witney. Multiple testing  
282 correction was used for comparison of groups within ANOVA, Kruskal-Wallis test was  
283 used in the case of data not-normally distributed. Statistical test used to assess  
284 statistical significance is indicated in each figure legend with the precise p-value  
285 provided in the graphs where statistical significance was observed. P values less  
286 than 0.05 were considered statistically significant. Sample sizes can be found in the  
287 figure or figure legend. Power analysis was performed by using PASS 11 software to  
288 determine approximate sample sizes for the animal experiments.

289

### 290 **Online Figures I - XI**

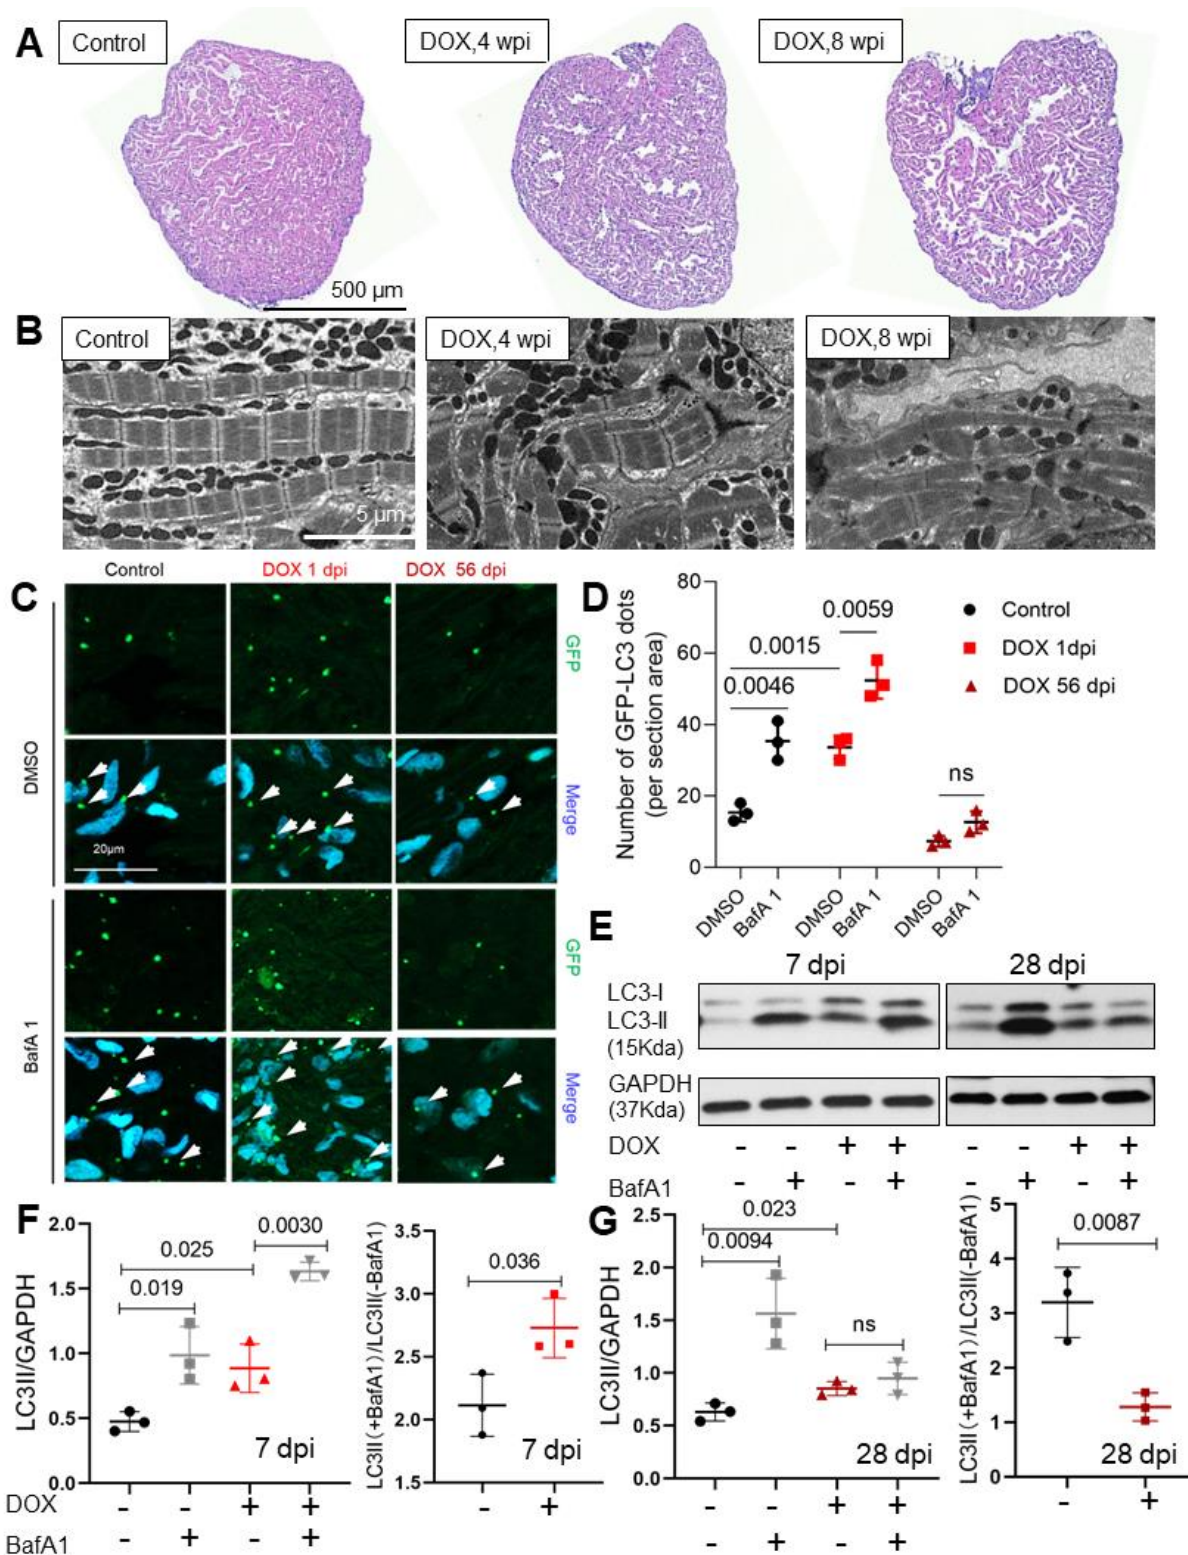

291

292 **Online Fig. I. Supporting information on the zebrafish aAIC model.** (A) HE staining  
 293 and (B) Transmission electron microscopy (TEM) showed muscular disarray and  
 294 myofibril loss in the fish ventricle compared with wild type control at 4 weeks and 8  
 295 weeks after DOX injection. (C) Representative images of sectioned ventricles of  
 296 *Tg(GFP-Lc3)* zebrafish 1 and 56 dpi with or without BafA1 treatment. White arrows  
 297 indicate LC3 aggregates. N=3 hearts/group. (D) Quantification of the GFP-LC3



---

298 aggregates in 1 dpi and 56 dpi. (E) Representative Western blot showing temporal  
299 changes in LC3-II protein expression in the hearts of adult zebrafish with AIC.  
300 Bafilomycin A1 (30 nM) was administered 4 h before the zebrafish were sacrificed. (F  
301 and G) Quantification of LC3-II and the ratio between hearts treated with and without  
302 BafA1 in (C), n=3 hearts/group. Bars represent the mean  $\pm$  SD. Comparisons were  
303 performed by the Mann-Whitney test (two groups) or the Kruskal-Wallis test (multiple  
304 groups) followed by post hoc Tukey's test.

305

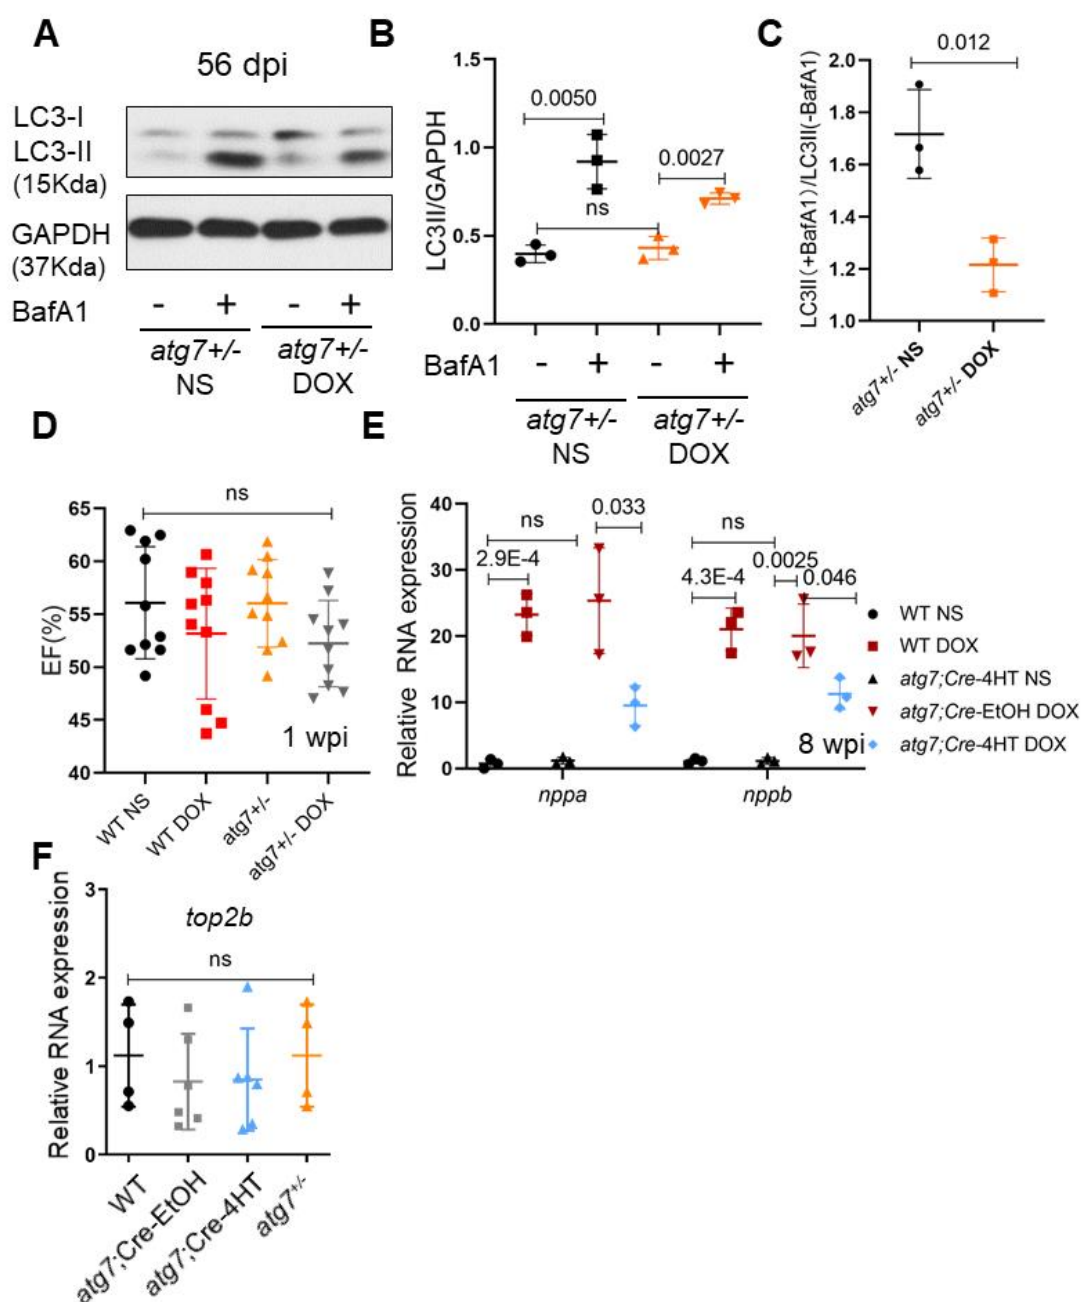

306

307 **Online Fig. II. Supporting information on the *atg7+/-* and *atg7* OE zebrafish.** (A)  
 308 Representative images of a Western blot showing the LC3 expression in the hearts  
 309 *atg7+/-* zebrafish aAIC model at 56 days post DOX injection, in the absence or  
 310 presence of 30 nM BafA1 for 4 h. (B and C) Quantification of the Western blot data in  
 311 (A),  $n = 3$  in each group. (D) *atg7+/-* did not affect cardiac function 1 week after  
 312 injection with DOX. Ventricular ejection fraction of WT and *atg7+/-* zebrafish after  
 313 induced DOX stress 1week post-injection (wpi) is shown ( $n=10$ ). (E) Molecular  
 314 markers are rescued by *atg7* OE. The levels of *nppa* and *nppb* gene transcript

---

315 expression were assessed by quantitative RT-PCR 8 wpi. n=3 per group. (F)The  
316 expression level of top2b transcript were assessed by RT-PCR in either genetic  
317 manipulations of atg7. One-way ANOVA followed by Tukey's post hoc test was used  
318 in (D) and (F); Mann-Whitney test in (C); Kruskal-Wallis test was used followed by post  
319 hoc Tukey's test in (B) and (E). WT, wild type; DOX, doxorubicin.

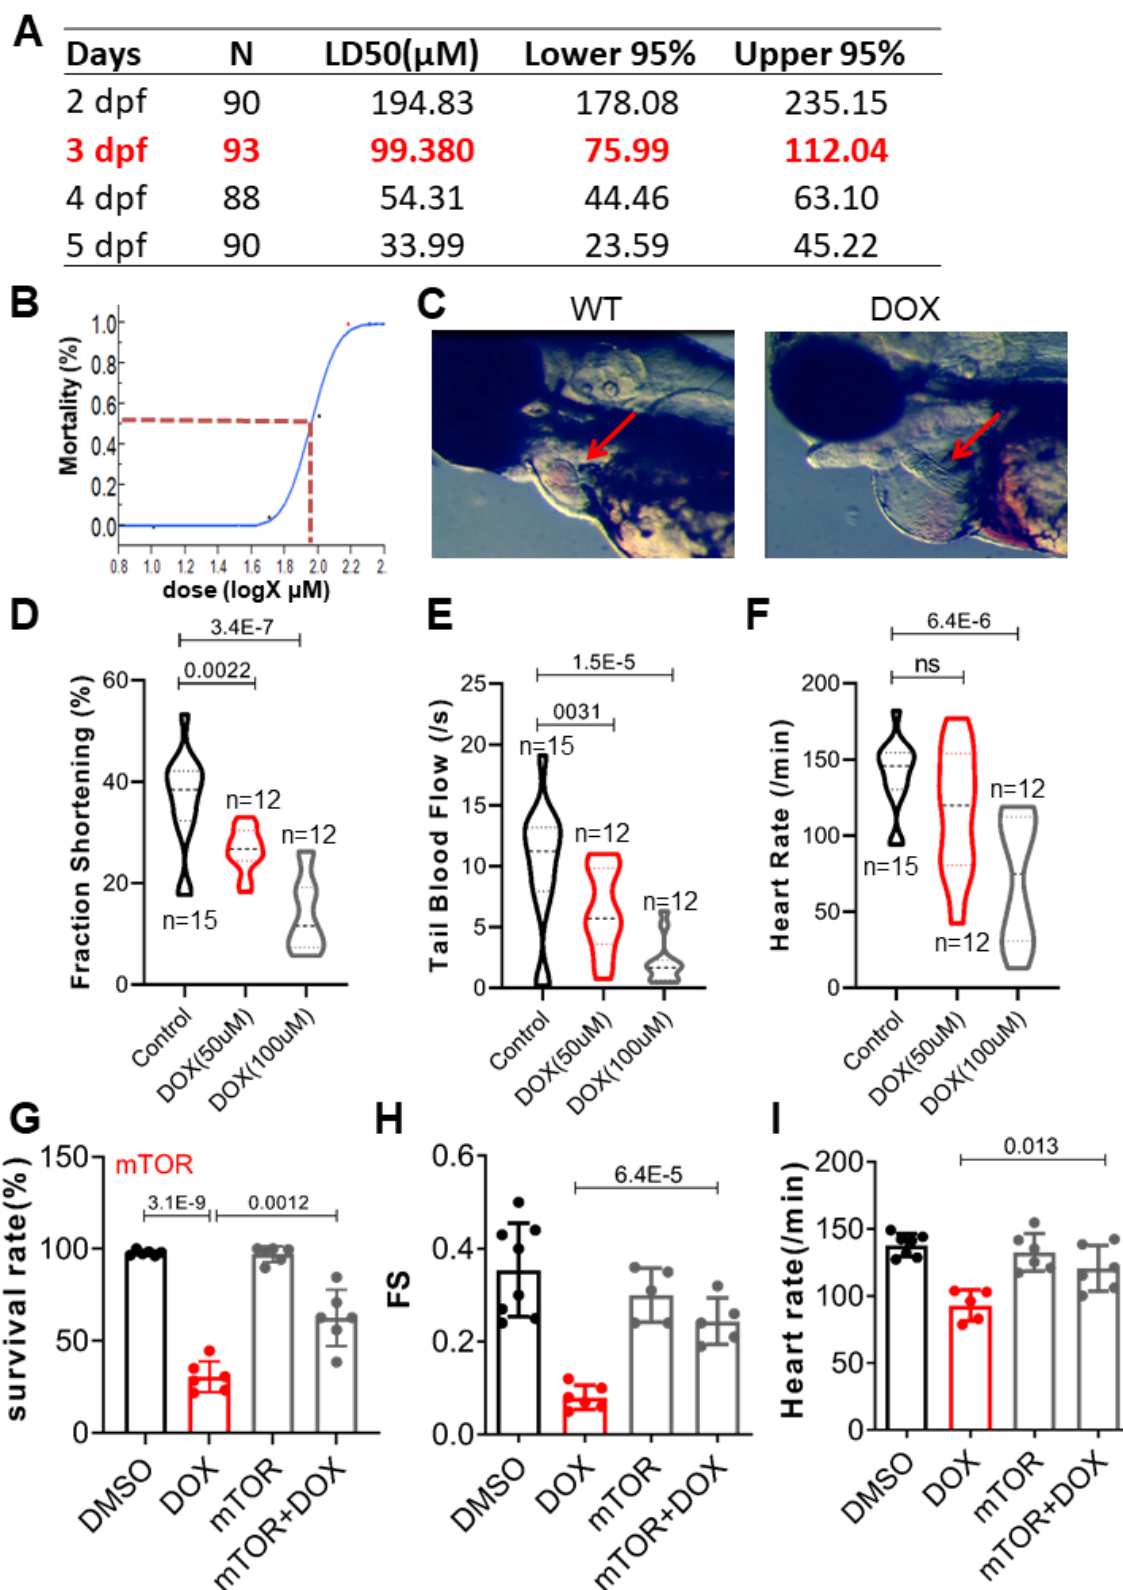

320

321 **Online Fig. III. Establishment of an eAIC model with zebrafish embryos.** (A)  
 322 LD50 and the associated 95% confidence interval at the indicated timepoints. (B)  
 323 Dose-mortality curve for DOX-treated zebrafish embryos. (C) Representative images  
 324 of the fish embryos treated with or without DOX. Arrows indicate the location of the

---

325 ventricle. (D) FS was reduced by the DOX-induced stress in a dose-dependent  
326 manner. (E) Tail blood flow was reduced by DOX-induced stress in a dose-  
327 dependent manner. (F) Heart rate was reduced by DOX-induced stress in a dose-  
328 dependent manner. (G to I) *mtor*<sup>+/-</sup> exerts therapeutic effects on eAIC, as indicated  
329 by the recovered survival rate, FS and heart rate. Kruskal-Wallis test was used  
330 followed by post hoc Tukey's test.

331

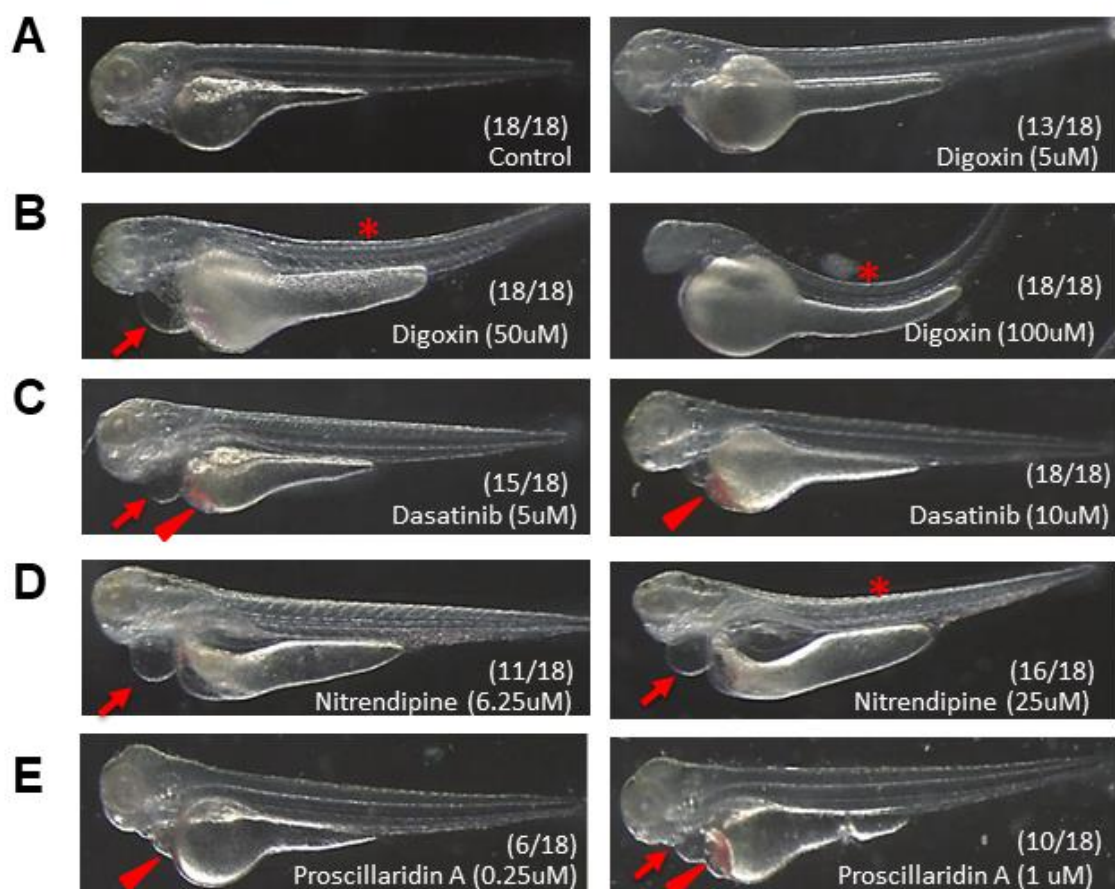

332

333 **Online Fig. IV. Digoxin, dasatinib, nitrendipine, and proscillaridin induce**  
 334 **embryonic phenotypes in zebrafish.** Representative embryonic phenotypes,  
 335 including pericardial edema (arrow), blood accumulation (arrowhead), and curly body  
 336 (\*), are shown. Eighteen embryos were assessed for each drug at the indicated  
 337 concentration. The number of fish with the indicated phenotypes are listed.

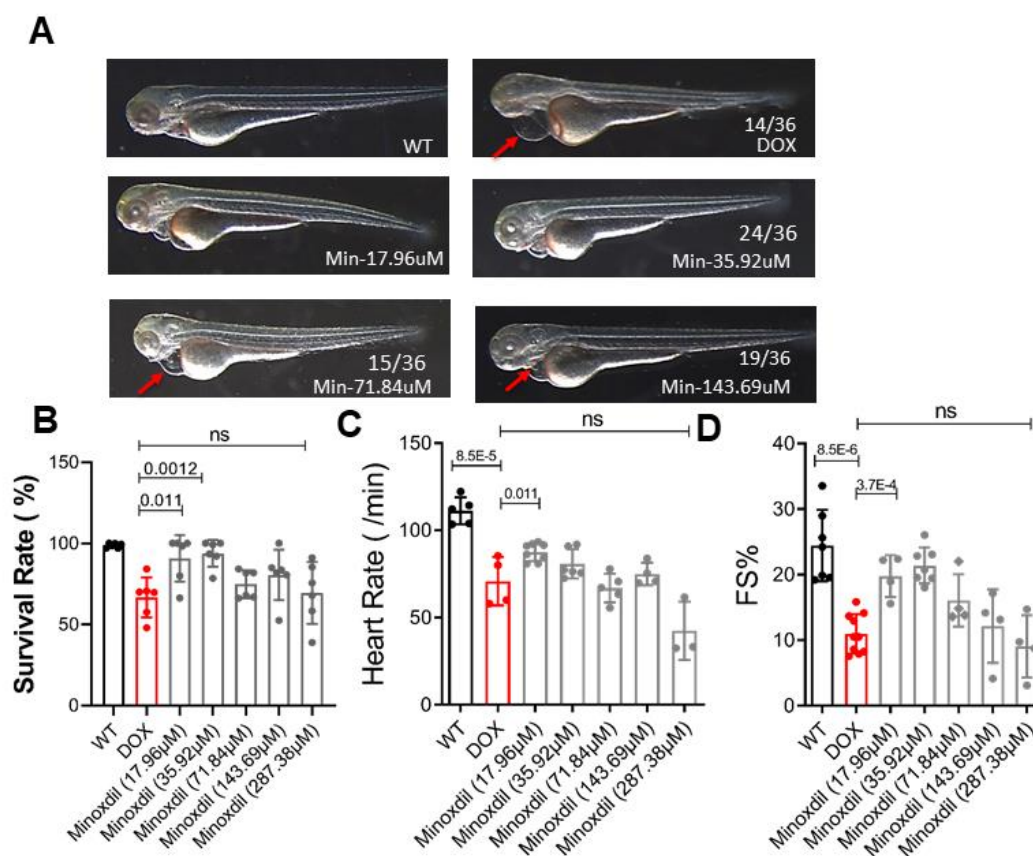

338

339 **Online Fig. V. Assessing the therapeutic efficacy of a FAA using the eAIC**  
 340 **models with minoxidil as an example.** (A) Five concentrations (1/20, 1/40, 1/80,  
 341 1/160, and 1/320 of the LD50) of minoxidil were used to treat eAIC. The  
 342 concentration at 35.92 μM (1/80 of the LD50) was the most effective (24/36). (B)  
 343 Quantification of survival, heart rate and FS in the eAIC zebrafish treated with  
 344 minoxidil at 5 different concentrations. One-way ANOVA followed by post hoc  
 345 Bonferroni test.

346

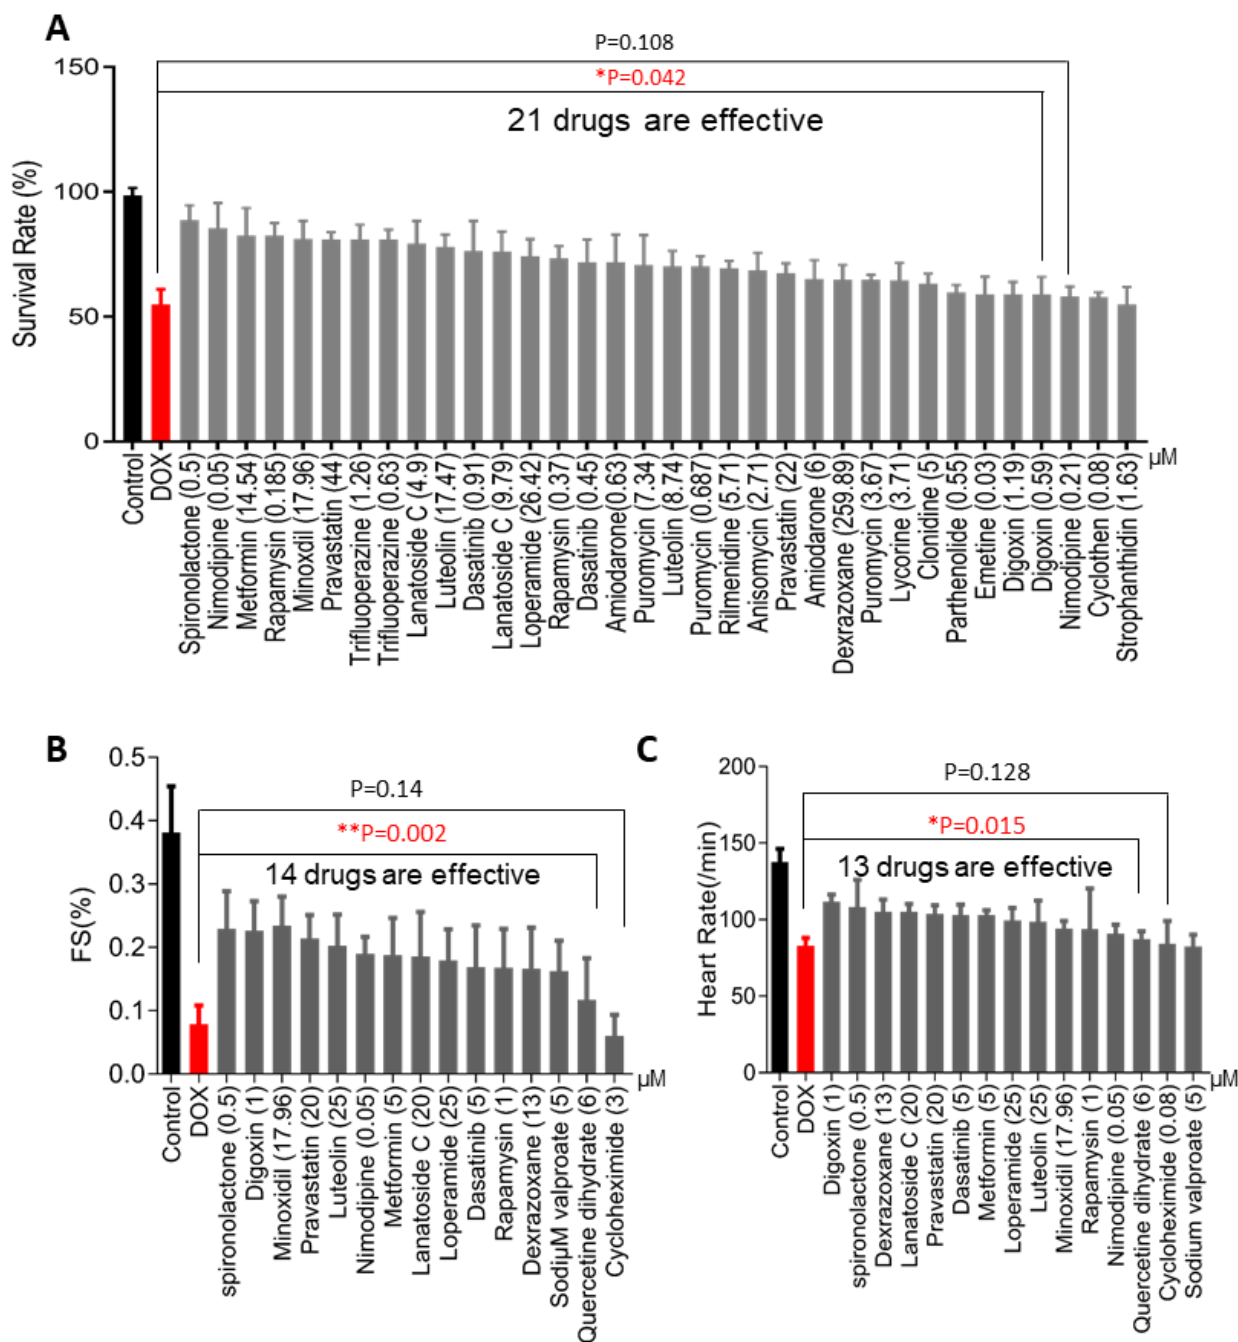

347

348 **Online Fig. VI. The therapeutic effects of FAAs on the eAIC model were ranked**  
 349 **based on survival rate, fraction shortening (FS) and heart rate.** Different  
 350 concentrations of FAAs and their therapeutic effects as determined by the survival (A),  
 351 FS (n=4-16) (B), and heart rate (n=3-9) (C) criteria, with 21, 14 and 13 FAAs considered  
 352 effective, respectively;  $P < 0.05$  was the cutoff for significance.

353



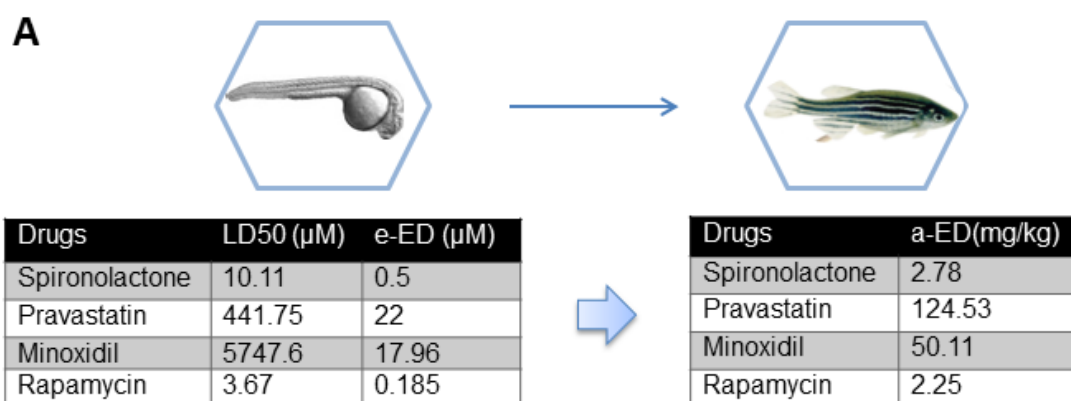

**B**

**Formula**

$$\text{a-Dose(mg/kg)} = \text{e-dose}(\mu\text{M}) \times \frac{\text{Volume}}{\text{Number}} \times 60 \times \frac{\text{Drug}}{\text{MW(g/mol)}} \times 0.3$$

$\downarrow$  dose in embryos       $\uparrow$  Weight ratio 300/5(adult/embryo)       $\downarrow$  Weight Per fish: 0.3g

**C**

$$W_h = 60\text{kg} \quad W_m = 20\text{g} \quad Km_m = 3 \quad Km_h = 37$$

$$\text{ED}_h(\text{mg/Kg/day}) = \text{Dose for 60kg patient(mg/d)} \div W_h$$

$$= 50\text{mg/d} \div 60\text{Kg}$$

$$\text{ED}_m = \text{ED}_h \times [Km_h / Km_m] = 10.23\text{kg/kg}$$

Notes: Human effective dose (ED) were obtained according to FDA guidelines: FDA reference ID3685475. W: weight; h:human; f: fish; Km: Factor for converting mg/kg dose to mg/ m<sup>2</sup> dose.

354

355 **Online Fig. VII. Effective doses (EDs) for the top FAAs in the aAIC models were**  
 356 **determined from the effective doses (EDs) in the eAIC.** (A) While the LD50 and  
 357 ED in the eAIC models (e-ED) were experimentally determined, the ED in the aAIC  
 358 models (a-ED) was deduced using the formula shown in (B). (B) We assumed that  
 359 all the drugs added to the 96-well plates (3 embryos in every well containing 0.2 ml  
 360 of medium) were absorbed by the zebrafish embryos. The weight ratio between adult  
 361 fish (0.3 g) and embryos (0.005 g) was 60 (300/5). ED: Effective Dose. (C) Drug  
 362 dose conversion of minoxidil from human to mouse according to the FDA guideline.

363

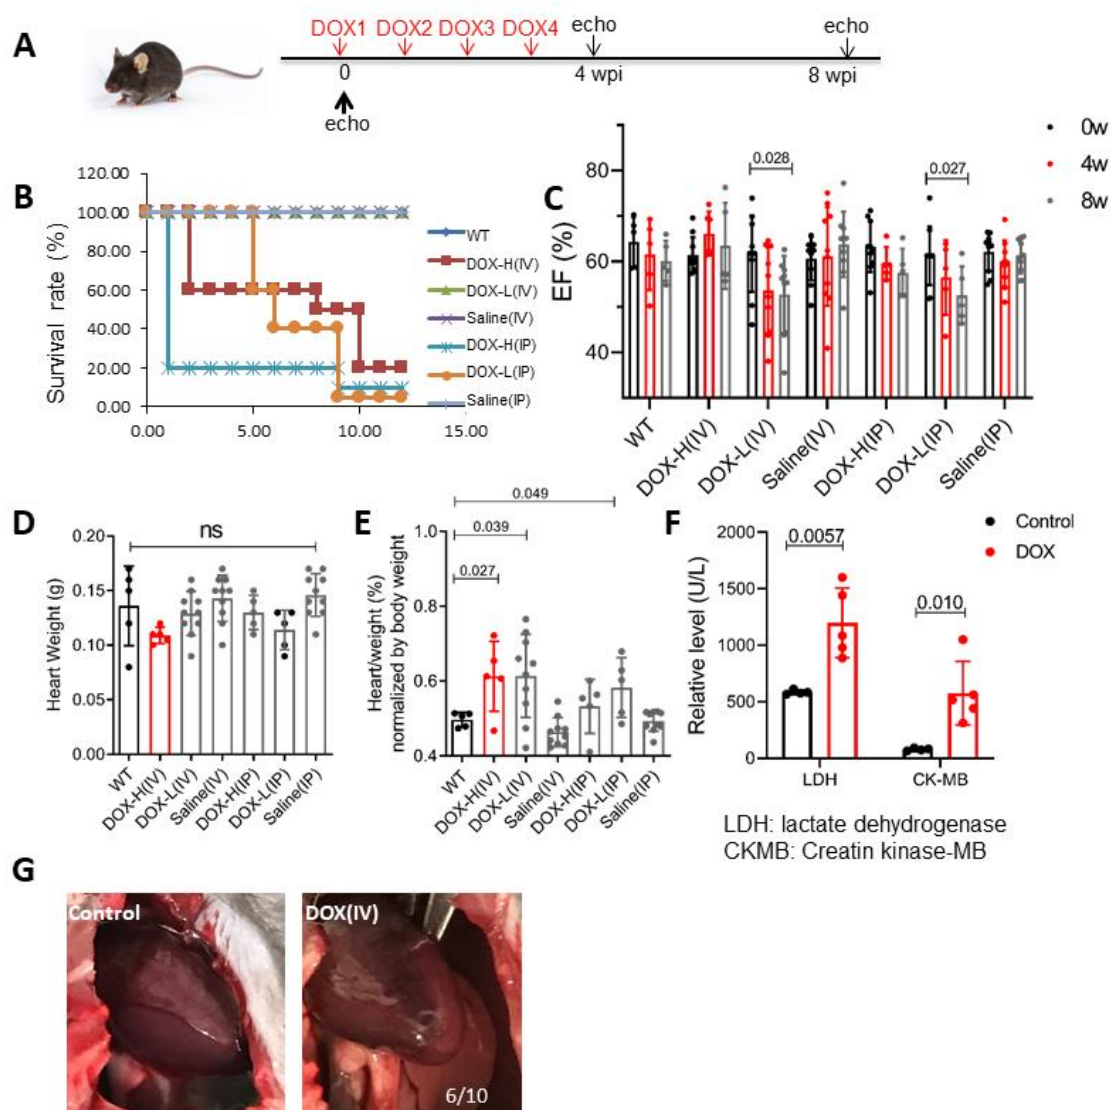

364

365 **Online Fig. VIII. Generation of a mouse AIC model.** (A) Schematics of the  
 366 experimental procedure for establishing the AIC mouse model. Echocardiography was  
 367 performed immediately before the first injection, 4 weeks after the first injection, and 8  
 368 weeks after the first injection. (B) Approximately 40% of the mice in the DOX-H(IV)  
 369 group died 9 dpi, 80% of mice in the DOX-H(IP) group died at 1 week, 50% of mice in  
 370 the DOX-L(IP) group died, and no mice died in the DOX-L(IV) group. N=5~10 per  
 371 group. (C) EF (cube) of both DOX-L(IV) and DOX-L(IP) was decreased. (D and E)  
 372 Heart weight was increased in the DOX-L(IP) group after normalization to body weight.  
 373 N=5~10 per group. (F) LDH and CK-MB levels in serum were significantly increased  
 374 in the DOX-L(IV) group. N=5~10 per group. (G) Heart structure was abnormal in the  
 375 DOX(IV) group. DOX-H: single injection of high-dose DOX (20 mg/kg); DOX-L: four  
 376 consecutive injections of low-dose DOX (5 mg/kg); IP: intraperitoneal injection; IV:

---

377 intravenous injection (tail vein). Comparisons were performed by the Mann-Whitney  
378 test (two groups) or the Kruskal-Wallis test (multiple groups).

379

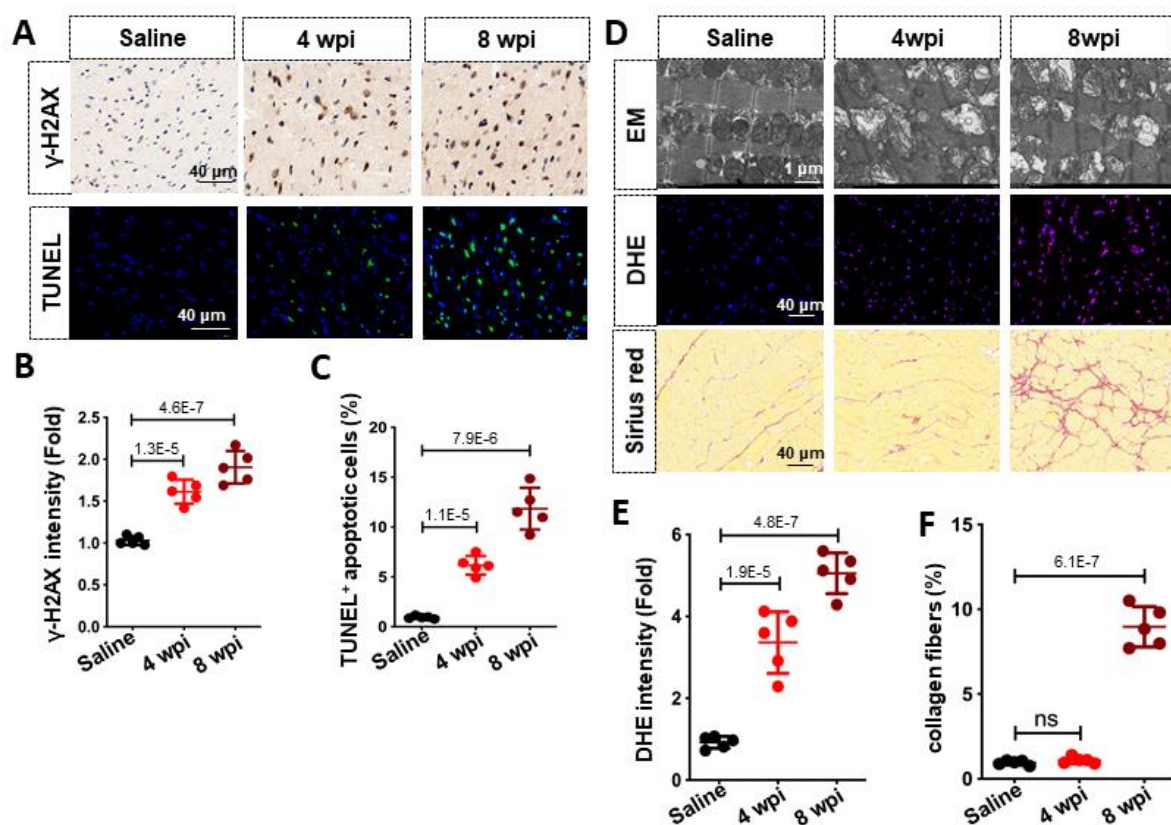

380

381 **Online Fig. IX. Histological and immunohistochemical analysis of the mouse**  
 382 **AIC model.** (A) The heart samples were stained with antibody against  $\gamma$ -H2AX (a  
 383 marker for DSBs). TUNEL staining: Green color represents apoptotic cells via  
 384 TUNEL staining; blue color represents cell nucleus stained by DAPI. (B and C)  
 385 Quantification of (A). Scale car=40  $\mu$ m. (D) Electron microscopy, DHE staining and  
 386 Sirius red staining of mice hearts from saline group, 4 wpi group and 8 wpi group.  
 387 Scale bar=1  $\mu$ m (the first row). Scale bar=40  $\mu$ m (the lower two rows). Analysis of  
 388 DHE intensity (E) and collagen fibrosis (D). N=5 mice per group. Data are presented  
 389 as mean  $\pm$  SD. Kruskal-Wallis test was used followed by post hoc Tukey's test.

390

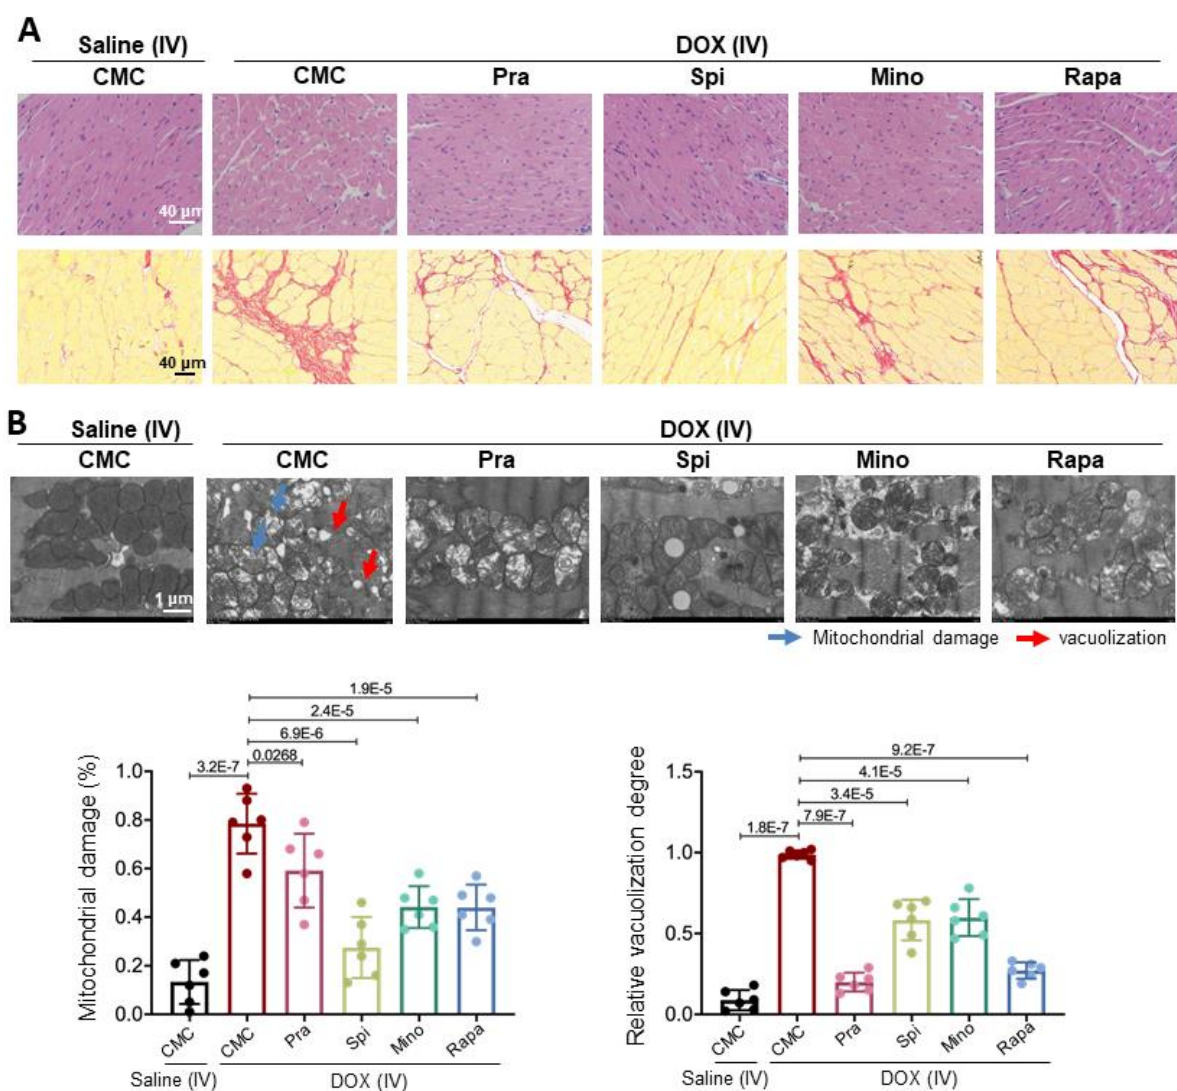

391

392 **Online Fig. X. Four drugs rescued histological and ultrastructural abnormalities**  
 393 **in hearts of the mouse AIC model.** (A) Shown are images after HE staining (top  
 394 panels) and sirius red staining (lower panels). Scale bar=40  $\mu\text{m}$ . (B) Electron  
 395 microscopy showed mitochondrial damage (blue arrows) and vacuolization (red arrows)  
 396 by DOX can be rescued in drug treated hearts. Scale bar=1  $\mu\text{m}$ . CMC: a 0.5% aqueous  
 397 solution of sodium carboxymethylcellulose (CMC) was applied as a vehicle. Kruskal-  
 398 Wallis test was used followed by post hoc Tukey's test.

399

400

401

402

403

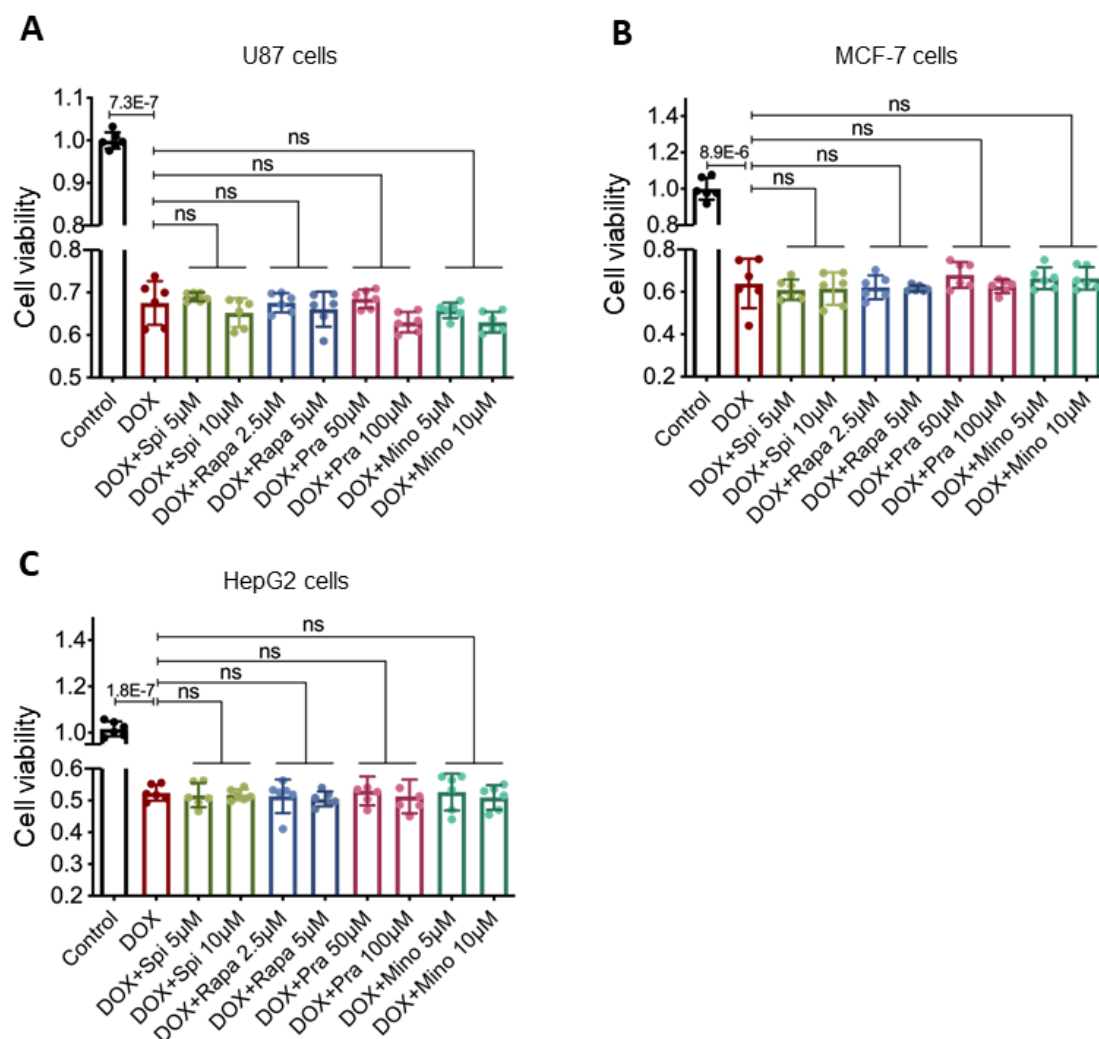

404

405 **Online Fig. XI. In three in vitro tumor models, none of the four FAA drugs affect**  
 406 **DOX's antitumor activity.** Shown are proliferative index in U87 (A) MCF-7 (B), and  
 407 HepG2 cells (C). Kruskal-Wallis test was used followed by post hoc Tukey's test.

408

409 **Online Table. I. LD50 for 37 FAAs.**

| <b>Drug</b>              | <b>Company</b>    | <b>Catalogue number</b> | <b>LD50 (<math>\mu\text{M}</math>)</b> | <b>Reference</b> |
|--------------------------|-------------------|-------------------------|----------------------------------------|------------------|
| Dexrazoxane              | Sigma-Aldrich     | D1446                   | 41582.16                               | 7                |
| Minoxidil                | Sigma-Aldrich     | M4145                   | 5747.60                                | 27               |
| Carbamazepine            | Sigma-Aldrich     | C4024                   | 1056.42                                | 26               |
| Metformin                | Sigma-Aldrich     | M0605000                | 581.6                                  | 26               |
| Loperamide               | Sigma-Aldrich     | L4762                   | 528.31                                 | 27               |
| Pravastatin              | Sigma-Aldrich     | P4498                   | 441.75                                 | 26               |
| Quercetine               | Millipore         | 551600-M                | 382.82                                 | 28               |
| Luteolin                 | Sigma-Aldrich     | L9283                   | 174.74                                 | 28               |
| Strophanthidin           | Sigma-Aldrich     | S6626                   | 130.22                                 | 28               |
| Verapamil                | Sigma-Aldrich     | 676777                  | 107.21                                 | 26,27,29         |
| Strophantine Octahydrate | Fisher scientific | AC161732500             | 105.26                                 | 28               |
| Clonidine                | Sigma-Aldrich     | 1140393                 | 101.66                                 | 26,27            |
| Lanatoside C             | Sigma-Aldrich     | L2261                   | 97.9                                   | 28               |
| Lycorine                 | Sigma-Aldrich     | L5139                   | 74.15                                  | 28               |
| Rilmenidine              | Sigma-Aldrich     | R134                    | 57.12                                  | 26               |
| Sodium valproate         | Sigma-Aldrich     | S0930000                | 56.72                                  | 26,27            |
| Anisomycin               | Sigma-Aldrich     | A9789                   | 54.2                                   | 28               |
| Temozolomide             | Sigma-Aldrich     | T2577                   | 39.97                                  | 27               |
| Digoxin                  | Supelco           | D6003                   | 26.89                                  | 28               |
| Digitoxigenin            | Sigma-Aldrich     | D9404                   | 23.28                                  | 28               |
| Nitrendipine             | Sigma-Aldrich     | N144                    | 15.21                                  | 27               |
| Trifluoperazine          | Sigma-Aldrich     | T8516                   | 12.58                                  | 26,29            |

|                         |               |         |              |          |
|-------------------------|---------------|---------|--------------|----------|
| Amiodarone              | Sigma-Aldrich | A8423   | 12.5         | 27,29    |
| Parthenolide            | Sigma-Aldrich | P0667   | 10.96        | 28       |
| Spironolactone          | Sigma-Aldrich | S3378   | 10.11        | 28       |
| Dasatinib               | Sigma-Aldrich | SML2589 | 9.07         | 28       |
| Puromycin               | Sigma-Aldrich | P8833   | 6.87         | 28       |
| Kaempferol              | Sigma-Aldrich | K0133   | 4.3          | 28       |
| Nimodipine              | Sigma-Aldrich | N149    | 4.28         | 27       |
| Rapamycin               | Sigma-Aldrich | R8781   | 3.67         | 26,27,29 |
| Verapamil Hydrochloride | Sigma-Aldrich | V4629   | 2.38         | 28,29    |
| Tat-beclin 1            | AS-65467      | AnaSpec | 1.41         | 26,47    |
| Cycloheximide           | Sigma-Aldrich | C4859   | 0.76         | 28       |
| Amrinone                | Sigma-Aldrich | A9251   | 0.71         | 28       |
| Emetine                 | Sigma-Aldrich | E2375   | 0.55         | 28       |
| Proscillaridin A        | Sigma-Aldrich | E2375   | 0.36         | 28       |
| Helveticoside           | Sigma-Aldrich | H2634   | No available | 28       |
| Lithium                 | Sigma-Aldrich | 499811  | No available | 26       |

410

411 The ordering information for 37 FAAs and references suggesting their identity as  
412 autophagy activators. The LD50 for each drug was determined experimentally, as  
413 exemplified by DOX (see Online Fig. II A-B).

414



| Drugs                           | Survival | FS | Heart Rate | Phenotype   | Score | Rank | Reported/<br>new drug |
|---------------------------------|----------|----|------------|-------------|-------|------|-----------------------|
| Spirolactone (0.5 $\mu$ M)      | 1        | 1  | 2          | NO          | 1.33  | 1    | Reported(57)          |
| Pravastatin (22 $\mu$ M)        | 2        | 3  | 5          | NO          | 3.33  | 2    | Reported(54)          |
| Metformin (14.54 $\mu$ M)       | 4        | 7  | 7          | NO          | 6.00  | 3    | Reported(58)          |
| Minoxidil (17.96 $\mu$ M)       | 7        | 4  | 10         | NO          | 7.00  | 4    | New                   |
| Nimodipine (0.05 $\mu$ M)       | 3        | 6  | 12         | NO          | 7.00  | 5    | New                   |
| Digoxin (1.19 $\mu$ M)          | 13       | 2  | 1          | YES (curly) | 7.33  | 6    | Reported(59)          |
| Lanatoside C (4.9 $\mu$ M)      | 10       | 10 | 4          | NO          | 8.00  | 7    | New                   |
| Rapamycin (0.185 $\mu$ M)       | 6        | 9  | 11         | NO          | 8.67  | 8    | Reported(17)          |
| Dexrazoxane (259.89 $\mu$ M)    | 11       | 13 | 3          | NO          | 9.00  | 9    | Reported(60)          |
| Luteolin (17.47 $\mu$ M)        | 8        | 5  | 9          | YES (edema) | 9.33  | 10   | Reported(61)          |
| Trifluoperazine (1.26 $\mu$ M)  | 5        | 8  | 16         | NO          | 9.67  | 11   | New                   |
| Dasatinib (0.91 $\mu$ M)        | 9        | 11 | 6          | YES (edema) | 10.67 | 12   | New                   |
| Loperamide (26.42 $\mu$ M)      | 14       | 12 | 8          | NO          | 11.33 | 13   | New                   |
| Cycloheximide (0.08 $\mu$ M)    | 15       | 16 | 14         | NO          | 15.00 | 14   | New                   |
| Quercetin (619.41 $\mu$ M)      | 18       | 15 | 13         | NO          | 15.33 | 15   | Reported(62)          |
| Puromycin (0.68 $\mu$ M)        | 16       | 17 | 17         | NO          | 16.67 | 16   | New                   |
| Valproate (5 $\mu$ M)           | 17       | 14 | 15         | YES (blood) | 17.33 | 17   | New                   |
| Proscillaridin A (0.02 $\mu$ M) | 12       | 18 | 18         | YES (edema) | 18.00 | 18   | New                   |

---

415 **Online Table. II. Ranking of the FAAs based on their therapeutic efficacy.**

416 The rankings of the FAAs were based on survival rate, heart function, heart rate;  
417 whether FAAs induce the acquisition of embryonic phenotypes in zebrafish; and the  
418 overall rank based on a combinatory score using the formula: combinatory  
419 score= $[(\text{rank based on survival rate} + \text{rank based on FS} + \text{rank based on heart}$   
420  $\text{rate})/3 + \text{Phenotype} * 2]$ . Information is presented on drugs that were previously  
421 reported in the literature as potentially effective for AIC and those that have been  
422 newly identified.
